# Supplementary material
Source: PubMed Central journal article supplement (PMC6358635)
Supplement: NIHMS952899-supplement-1.pdf [file NIHMS952899-supplement-1.pdf]

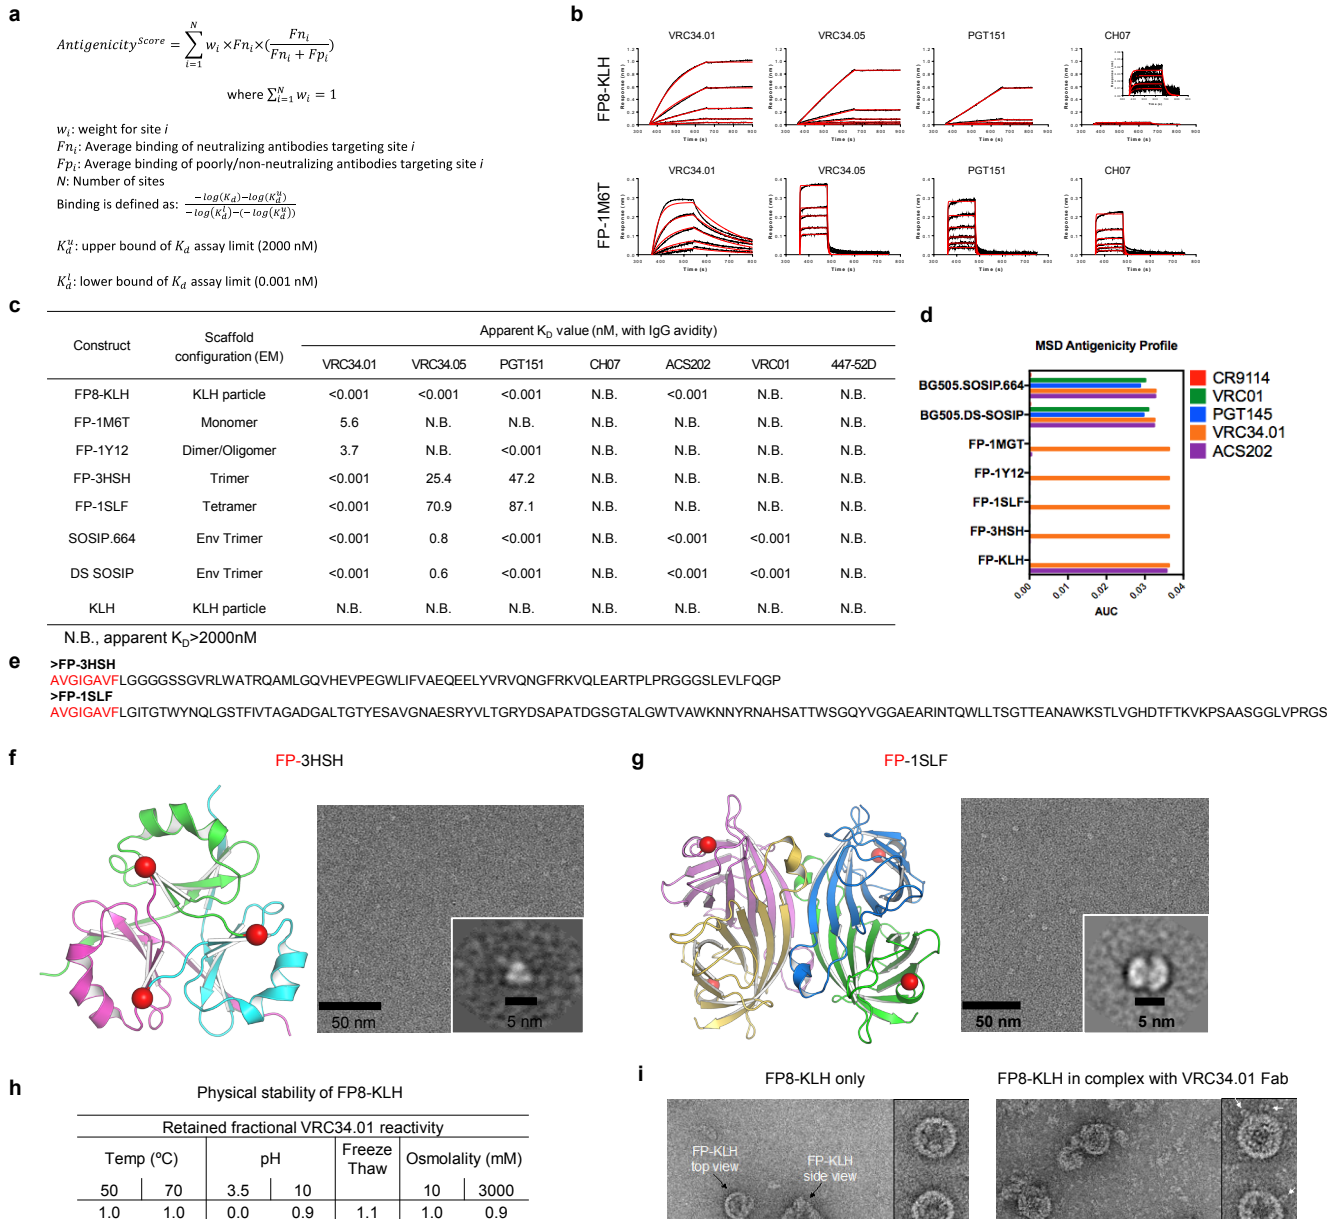

### Supplementary Figure 1. Characteristics of FP immunogens.

**a**, Metric of antigenicity. Here we focus on the FP site of vulnerability ( $N=1$ ). VRC34.01, VRC34.05, PGT151, and ACS202 were used as the representative neutralizing antibodies targeting FP, and CH07 was used as the representative poorly/non-neutralizing antibody targeting FP. See (c) for  $K_D$  data. **b**, Antigenicity assessment of FP immunogens by BLI method with Octet. Examples of Octet-binding curves for FP8-KLH and FP-1M6T epitope scaffold are shown. **c**, FP-immunogen antigenicity. FP-directed antibodies VRC34.01, VRC34.02, PGT151 and ACS202 were considered neutralizing, whereas CH07 was considered weakly or non-neutralizing. **d**, Immunogen quality control by MSD. **e**, Amino acid sequences for FP scaffolds: FP-3HSH and FP-1SLF. Additional epitope scaffolds are described in Kong et al. 2016. **f**, Structural models of FP-3HSH and FP-1SLF. **g**, Negative-stain EM images (inset shows 2D-class averages). **h**, Physical stability of FP8-KLH. Fractional values refer to VRC34.01 reactivity retained after exposure to various physical extremes as compared to initial reactivity with VRC34.01. Affinity measured by biolayer interferometry. **i**, Binding of VRC34.01 Fab to FP8-KLH illustrated by negative-stain electron microscopy. Examples of micrographs for FP8-KLH (left) and FP8-KLH mixed with VRC34.01 Fab at a molar ratio of 1:10 (right). Right insets, examples of raw particles for FP8-KLH and FP8-KLH in complex with VRC34.01 Fab. White arrows indicate bound Fab fragments. Bottom insets, examples of 2D-class averages. White arrows indicate bound Fab fragments. For (b, f, g and i),  $n=3$  experiments were performed independent with similar results.

**a** Neutralization assessment of 1<sup>st</sup>-generation murine immune sera

| Viruses                |      | Mice sera |      |      |      |      |      | ID50 <40 | ID80 <20 |
|------------------------|------|-----------|------|------|------|------|------|----------|----------|
|                        |      | 1868      | 1882 | 1883 | 1884 | 2586 | 2602 |          |          |
| SVA-MLV                | ID50 | 50        | 23   | 25   | <20  | 23   | <20  |          |          |
|                        | ID80 | <20       | <20  | <20  | <20  | <20  | <20  |          |          |
| BG505 WT               | ID50 | <20       | <20  | <20  | <20  | <20  | 60   |          |          |
|                        | ID80 | <20       | <20  | <20  | <20  | <20  | <20  |          |          |
| BG505 Δ611 glycan      | ID50 | 108       | 95   | 62   | 89   | 78   | 275  |          |          |
|                        | ID80 | 20        | <20  | <20  | <20  | <20  | 22   |          |          |
| BG505 ΔB8+Δ611 glycans | ID50 | 493       | 320  | 239  | 205  | 239  | 575  |          |          |
|                        | ID80 | 65        | 26   | 29   | 26   | <20  | 55   | 40-100   | 20-100   |

**b** Sera neutralization curves on 10-isolate panel with MLV as control

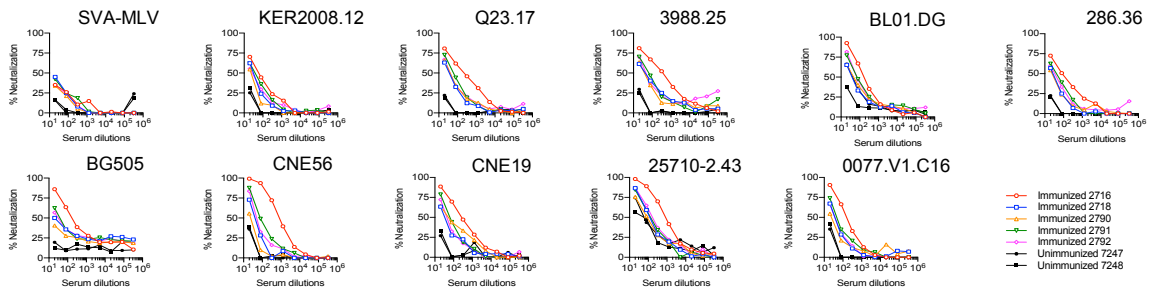

**c** FP-competed sera neutralization

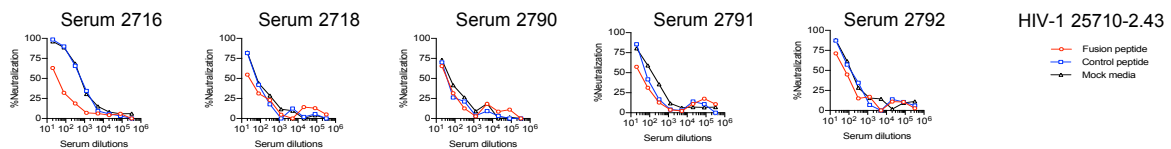

Summary of the effect of FP-competition to sera neutralization ID<sub>50</sub> on HIV-1 strain 25710-2.43

| Serum | Media ID50 | Fusion peptide |             |              | Control peptide |             |              |
|-------|------------|----------------|-------------|--------------|-----------------|-------------|--------------|
|       |            | ID50           | Fold change | % inhibition | ID50            | Fold change | % inhibition |
| 2716  | 610        | 33             | 18.5        | 95%          | 633             | 1.0         | -4%          |
| 2718  | 68         | 27             | 2.5         | 60%          | 61              | 1.1         | 10%          |
| 2790  | 55         | 38             | 1.4         | 31%          | 36              | 1.5         | 35%          |
| 2791  | 141        | 31             | 4.5         | 78%          | 61              | 2.3         | 57%          |
| 2792  | 118        | 48             | 2.5         | 59%          | 128             | 0.9         | -8%          |

**d** Summary of the effect of FP-competition to NHP sera and control antibody neutralization

| Plasma           | Virus      | Clade | Media ID50 | ID50 | Fusion peptide |              | ID50 | Control peptide |              |
|------------------|------------|-------|------------|------|----------------|--------------|------|-----------------|--------------|
|                  |            |       |            |      | Fold change    | % inhibition |      | Fold change     | % inhibition |
| NHP DFIW week 46 | Q23.17     | A     | 144        | <20  | >7.2           | >86.1%       | 145  | 1.0             | -0.7%        |
|                  | 45_01dG5   | B     | 78         | <20  | >3.9           | >74.3%       | 74   | 1.1             | 5.1%         |
|                  | 286.36     | C     | 117        | <20  | >5.9           | >82.9%       | 122  | 1.0             | -4.3%        |
|                  | 0815.V3.C3 | ACD   | 152        | <20  | >7.6           | >86.8%       | 161  | 0.9             | -5.9%        |

  

| Antibody | Virus      | Clade | Media IC50 | IC50  | Fusion peptide |              | IC50 | Control peptide |              |
|----------|------------|-------|------------|-------|----------------|--------------|------|-----------------|--------------|
|          |            |       |            |       | Fold change    | % inhibition |      | Fold change     | % inhibition |
| VRC34.01 | Q23.17     | A     | 0.10       | 14.10 | 139.6          | 99.3%        | 0.10 | 1.0             | 1.9%         |
|          | 45_01dG5   | B     | 0.31       | 18.00 | 58.6           | 98.3%        | 0.37 | 1.2             | 16.6%        |
|          | 286.36     | C     | >50        | >50   | N/A            | N/A          | >50  | N/A             | N/A          |
|          | 0815.V3.C3 | ACD   | 0.04       | 1.72  | 44.1           | 97.7%        | 0.03 | 0.9             | -14.7%       |
| VRC01    | Q23.17     | A     | 0.12       | 0.14  | 1.1            | 11.9%        | 0.13 | 1.1             | 6.3%         |
|          | 45_01dG5   | B     | 0.03       | 0.01  | 0.6            | -78.6%       | 0.03 | 1.1             | 7.4%         |
|          | 286.36     | C     | 0.46       | 0.38  | 0.8            | -21.3%       | 0.48 | 1.0             | 4.6%         |
|          | 0815.V3.C3 | ACD   | 0.04       | 0.04  | 1.0            | 2.5%         | 0.04 | 1.1             | 9.3%         |

**Supplementary Figure 2. Neutralization of immunized sera on 293T-derived HIV-1 Env-pseudotyped viruses in TZM-bl assay.** **a**, Neutralization assessment of 1<sup>st</sup>-generation immune sera from immunized mice in Fig. 1. **b**, Neutralization assessment of 2<sup>nd</sup>-generation immune sera from immunized mice in Fig. 3c. Serum neutralization curves are shown for 5 immunized and 2 unimmunized control C57/BL6 mice, tested on 10 wildtype HIV-1 Env-pseudotyped viruses (5 with complete glycans around the FP site and 5 naturally missing glycans as shown in Fig. 3c along with ID<sub>50</sub> titer). SVA-MLV was assessed as a control. **c**, FP-competed neutralization curves of indicated immunized mice sera on HIV-1 strain 25710-2.43. Sera were pre-incubated with the nine-amino acid FP (sequence AVGIGAVFL) (red), an non-cognate FLAG peptide (blue) or control media (black) before mixing with virus stock. ID<sub>50</sub> titers are shown the summary table. ID<sub>50</sub> fold change was calculated as ID50[media]/ID50[peptide]. % inhibition of FP or control peptide was calculated as (1-ID50[peptide]/ID50[media])\*100. **d**, Neutralization summary for FP competition shown in Fig. 6b. For antibody neutralization, IC50 fold change was calculated as IC50[peptide]/IC50[media]. % inhibition of FP or control peptide was calculated as (1-IC50[media]/IC50[peptide])\*100.

**a**

| Mouse 1868 |          |           |        |                 |           |            |        |                 |           |
|------------|----------|-----------|--------|-----------------|-----------|------------|--------|-----------------|-----------|
| Class      | Antibody | Heavy     |        |                 |           | Light      |        |                 |           |
|            |          | HV        | HJ     | HV identity (%) | CDR H3    | KV         | KJ     | KV identity (%) | CDR L3    |
|            | vFP1.01  | HV1-15*01 | HJ1*03 | 94.5            | LRNYWYFDV | KV1-117*01 | KJ2*01 | 95.6            | FQGSHVPYT |
|            | vFP1.02  | HV1-15*01 | HJ1*03 | 94.5            | LRNYWYFDV | KV1-117*01 | KJ2*01 | 95.9            | FQGSHVPYT |
| vFP1       | vFP2.01  | HV1-15*01 | HJ2*01 | 96.5            | LKRFYYFDY | KV1-117*01 | KJ4*01 | 93.2            | FQGSHVPYT |
|            | vFP3.01  | HV1-15*01 | HJ2*01 | 95.2            | LKRFYYFDY | KV1-117*01 | KJ4*01 | 95.6            | FQGSHFPFT |
|            | vFP4.01  | HV1-12*01 | HJ1*03 | 94.6            | LLPKWYFDV | KV1-117*01 | KJ2*01 | 96.9            | FQGSHVPYT |
| vFP5       | vFP5.01  | HV3-6*01  | HJ3*01 | 94.9            | EGNYRAY   | KV6-23*01  | KJ5*01 | 93.2            | QQYSSYPLT |
| vFP6       | vFP6.01  | HV1-7*01  | HJ2*01 | 93.1            | GYVAFHY   | KV2-112*01 | KJ4*01 | 97.6            | QLLVQHPFT |

  

| Mouse 2586 |          |           |        |                 |           |            |        |                 |           |
|------------|----------|-----------|--------|-----------------|-----------|------------|--------|-----------------|-----------|
| Class      | Antibody | HV        | HJ     | HV identity (%) | CDR H3    | KV         | KJ     | KV identity (%) | CDR L3    |
|            |          |           |        |                 |           |            |        |                 |           |
|            | vFP7.02  | HV1-15*01 | HJ1*03 | 96.9            | LRLYGYFDV | KV1-117*01 | KJ2*01 | 98.6            | FQGSHVPYT |
| vFP1       | vFP7.03  | HV1-15*01 | HJ1*03 | 96.5            | LRLYWYFDV | KV1-117*01 | KJ2.01 | 99.3            | FQGSHVPYT |
|            | vFP7.04  | HV1-15*01 | HJ1*03 | 97.9            | LRLYWYFDV | KV1-117*01 | KJ2*01 | 98.0            | FQGSHVPYT |
|            | vFP7.05  | HV1-15*01 | HJ1*03 | 96.2            | LRLYWYFDV | KV1-117*01 | KJ2*01 | 96.6            | FQGSHVPYT |

**b**

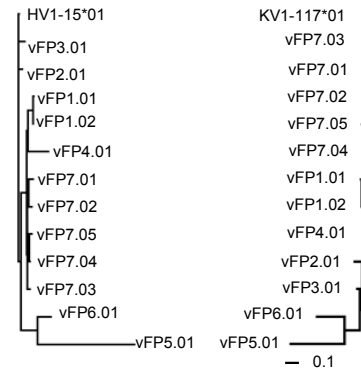

**c**

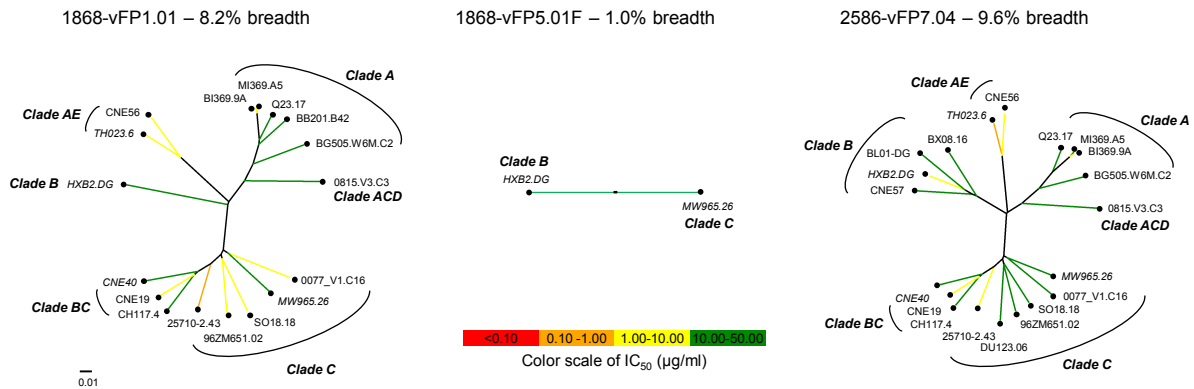

**Supplementary Figure 3. First generation vaccine-elicited antibodies targeting FP neutralize up to ~10% of HIV-1 strains.** **a**, Genetic characteristics of vaccine-elicited antibodies recognizing both HIV-1 Env and FP. Identity values are based on nucleotide sequence of the indicated heavy or light chain gene. **b**, Heavy and light chain phylogenetic tree. **c**, Neutralization dendrograms tested on 208-isolate panel for vaccine-elicited antibodies vFP1.01, vFP5.01 and vFP7.04, with branches only shown for neutralized strains and colored according to neutralization potency. Strains sensitive to V3-directed or CD4-induced antibodies shown in italics. See Supplementary Table 3a for titers.

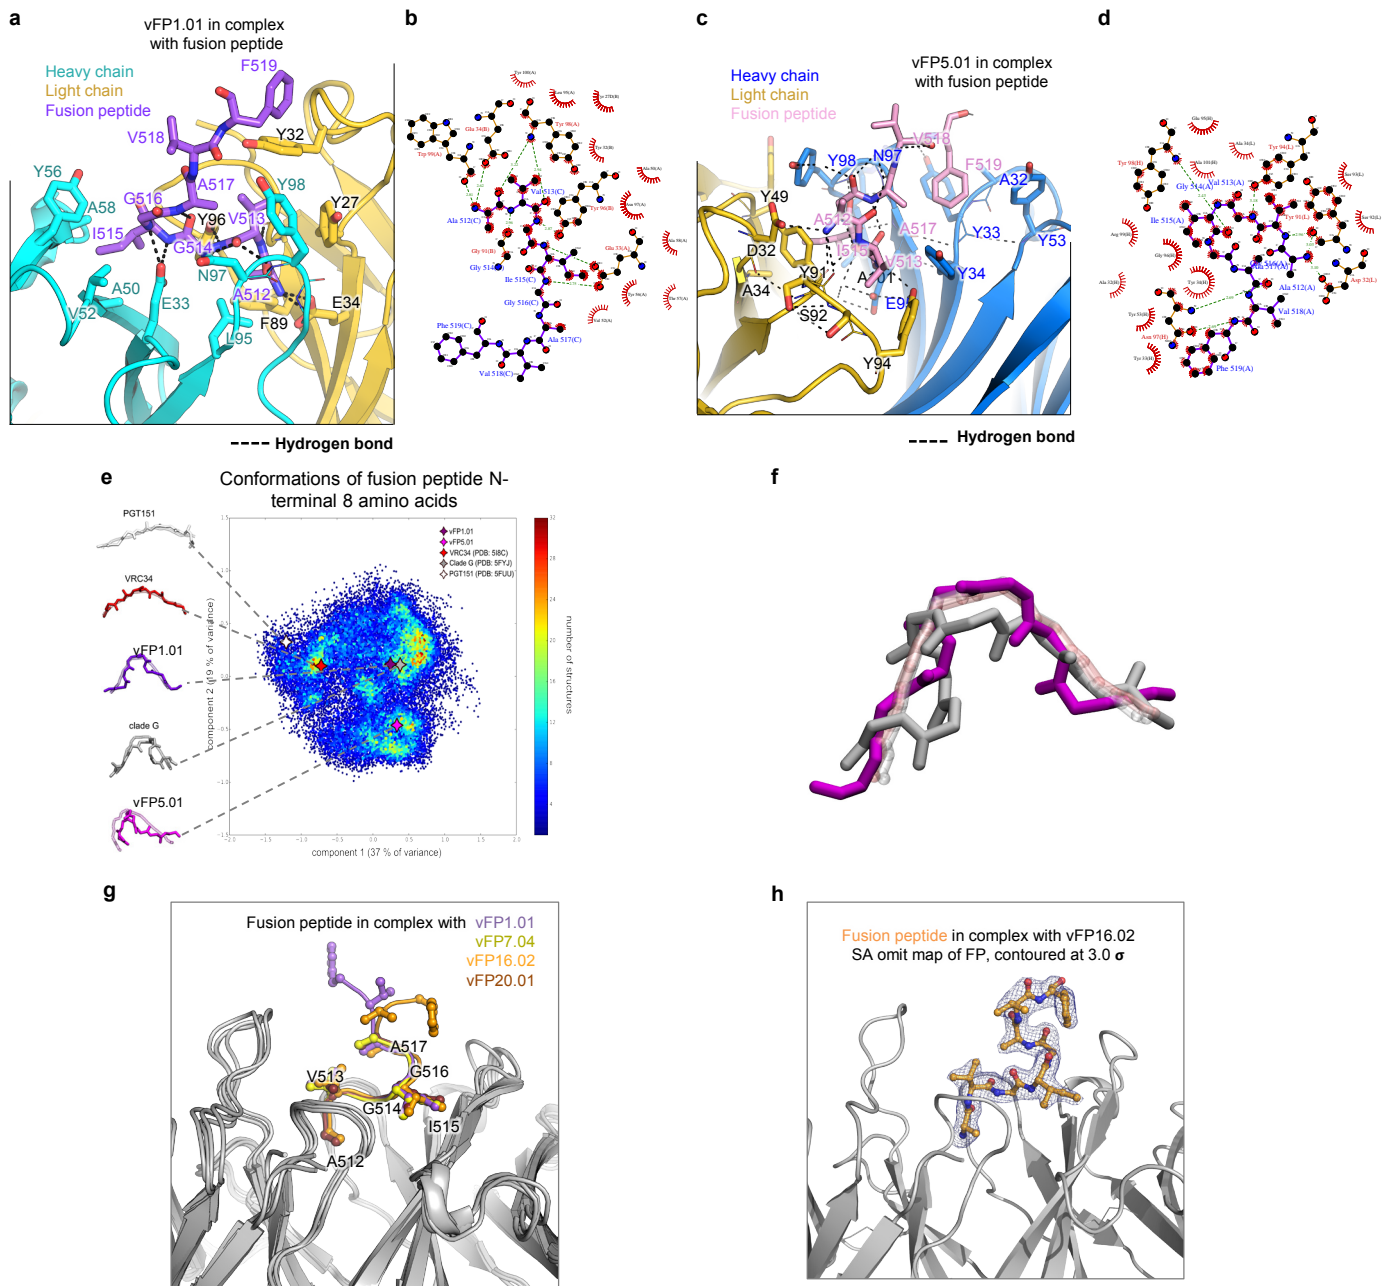

**Supplementary Figure 4. Structural details of FP-conformational diversity and recognition by antibody.** (a-b) vFP1.01 crystal structure with FP. **a**, Interaction between vFP1.01 and FP (contacting residues are shown as sticks). **b**, Ligplot showing the contact between vFP1.01 and FP. (c-d) vFP5.01 crystal structure with FP. **c**, Interaction between vFP5.01 and FP (contacting residues are shown as sticks). **d**, Ligplot showing the contact between vFP5.01 and FP. **e**, Principal component analysis of FP conformation based on molecular dynamics simulations of fully glycosylated HIV-1-Env trimer. Principal component projections (in transparency) are shown for HIV-1-fusion peptides bound by antibody (or for clade G Env trimer-5FYJ). Four prevalent clusters of fusion-peptide conformations were observed. Most prevalent was a symmetrical U-shaped conformation, which was recognized by FP1.01 and also observed in the fully glycosylated Env trimer from a Clade G isolate. A J-shaped conformation, recognized by FP5.01, was also highly prevalent, as was the extended linear conformation, recognized by VRC34.01. A related extended conformation was also recognized by antibody PGT151, though the conformational space sampled by the PGT151-bound antibody was substantially less dense than the other antibody-recognized conformations. **f**, Conformational superposition of the peptides analyzed in (e), along with the principal component projection (in transparency). Despite substantial difference in secondary structure, the two conformations share similar global shape. Thus, even though the FP-conformation in 5FYJ is slightly helical (one turn), both peptides adopt a symmetrical "U"-shape conformation. **g**, Superimposition of vFP1-class antibodies in complex with FP (residues 512-519). Antibody variable regions of vFP1-class antibodies, including vFP1.01, vFP7.04, vFP16.02 and vFP20.01, were aligned structurally. **h**, SA omit map of FP, in the crystal structure of vFP16.02 bound complex.

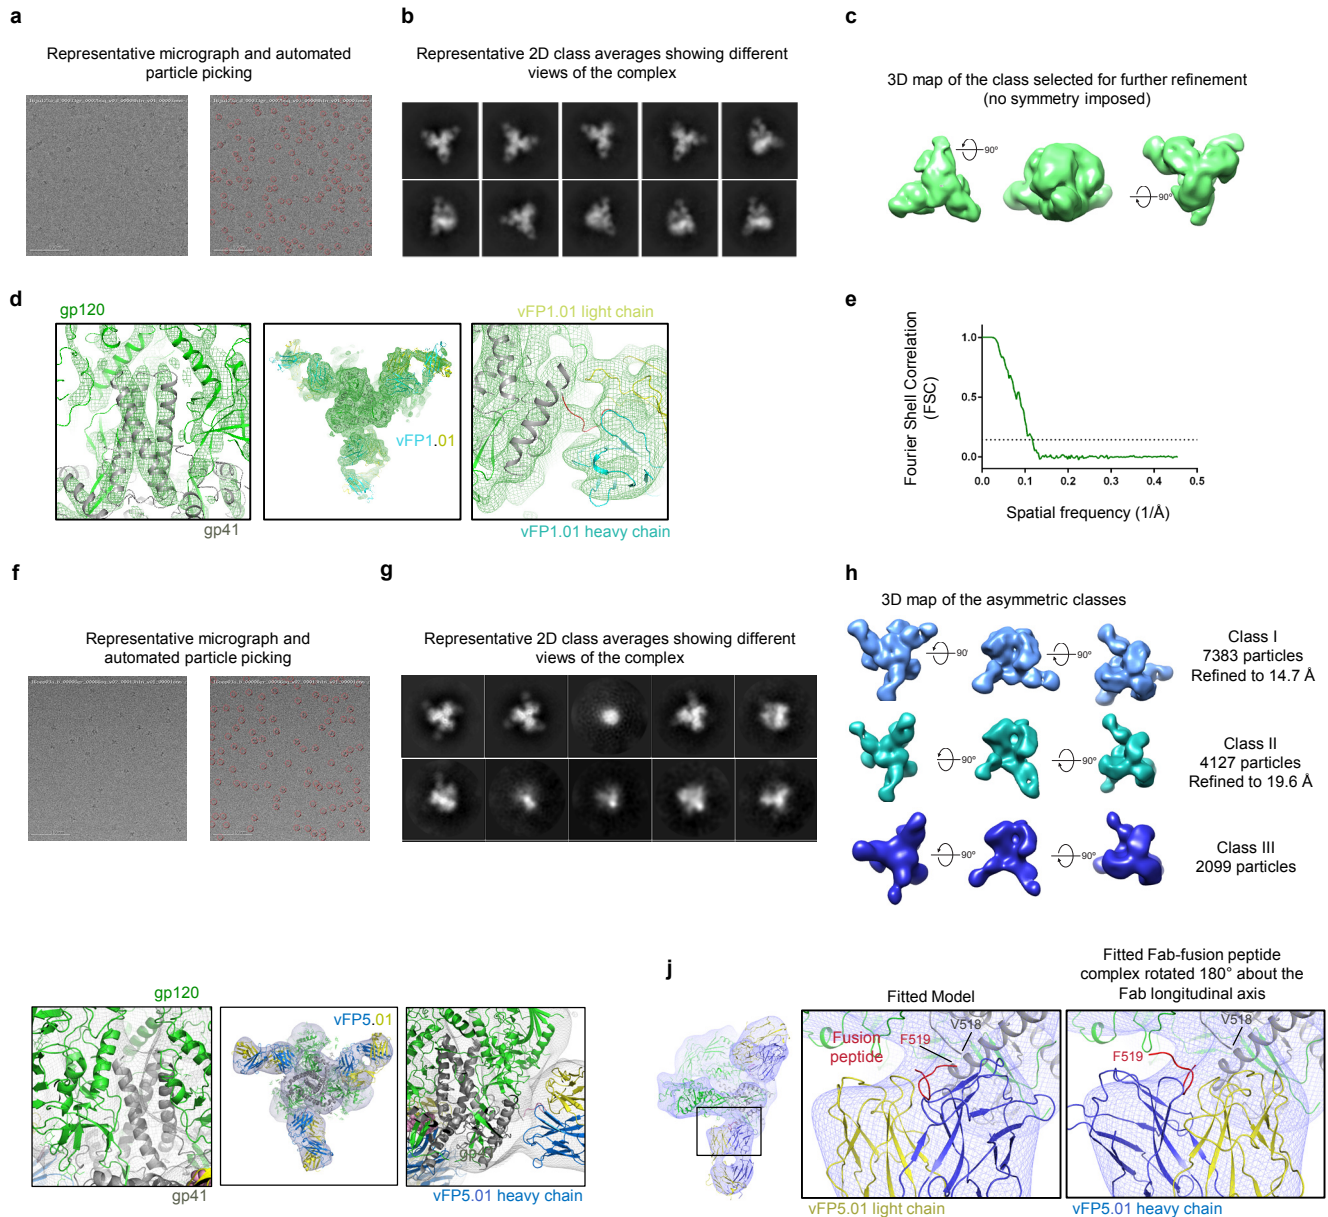

**Supplementary Figure 5. Cryo-EM details for reconstructions of up to 8.6 Å resolution. (a-e)** Details of cryo-EM structure of vFP1.01 complex with BG505 SOSIP trimer. **a**, Representative micrograph (left) with particles picked with DogPicker shown in red circles (right). **b**, Representative 2D class averages. **c**, Views of the 3D class selected for refinement. **d**, Snapshot of density and fit of model at different regions of the complex. The panel on the left is shown at a higher map contour than the other two panels to highlight the fit around the gp41 region of the trimer, which is one of the most well-defined regions of the complex. **e**, Fourier shell correlation plot for the 3D refinement (FSC<sub>0.143</sub> = 8.6 Å, indicated by the dotted line). **(f-i)** Details of cryo-EM structure of vFP5.01 complex with BG505 SOSIP trimer. **f**, Representative micrograph (left) with particles picked with DogPicker shown in red circles. **g**, Representative 2D class averages. **h**, Views of asymmetric 3D classes. **i**, Snapshot of refined Class I density and fit of model at different regions of the complex. **j**, Comparison of the orientation of the vFP5.01 Fab-fusion peptide crystal structure fitted into the cryo-EM map, with its orientation rotated 180° about the longitudinal axis of the Fab. In the fitted model, residue Phe519 of the fusion peptide bound to the Fab in the crystal structure is favorably placed near residue Val518 of the fitted trimer, whereas in the 180° rotated model, Phe519 diverges away from the electron density and gp41 in the fitted trimer. Cryo-EM data collection was performed once for each structure. The represented images in **(a, b, f and g)** was derived from the analysis of many particles in many images. Additional details on cryo-EM data collection, such as total number of particles, number of images, can be found in Supplementary Table 4.

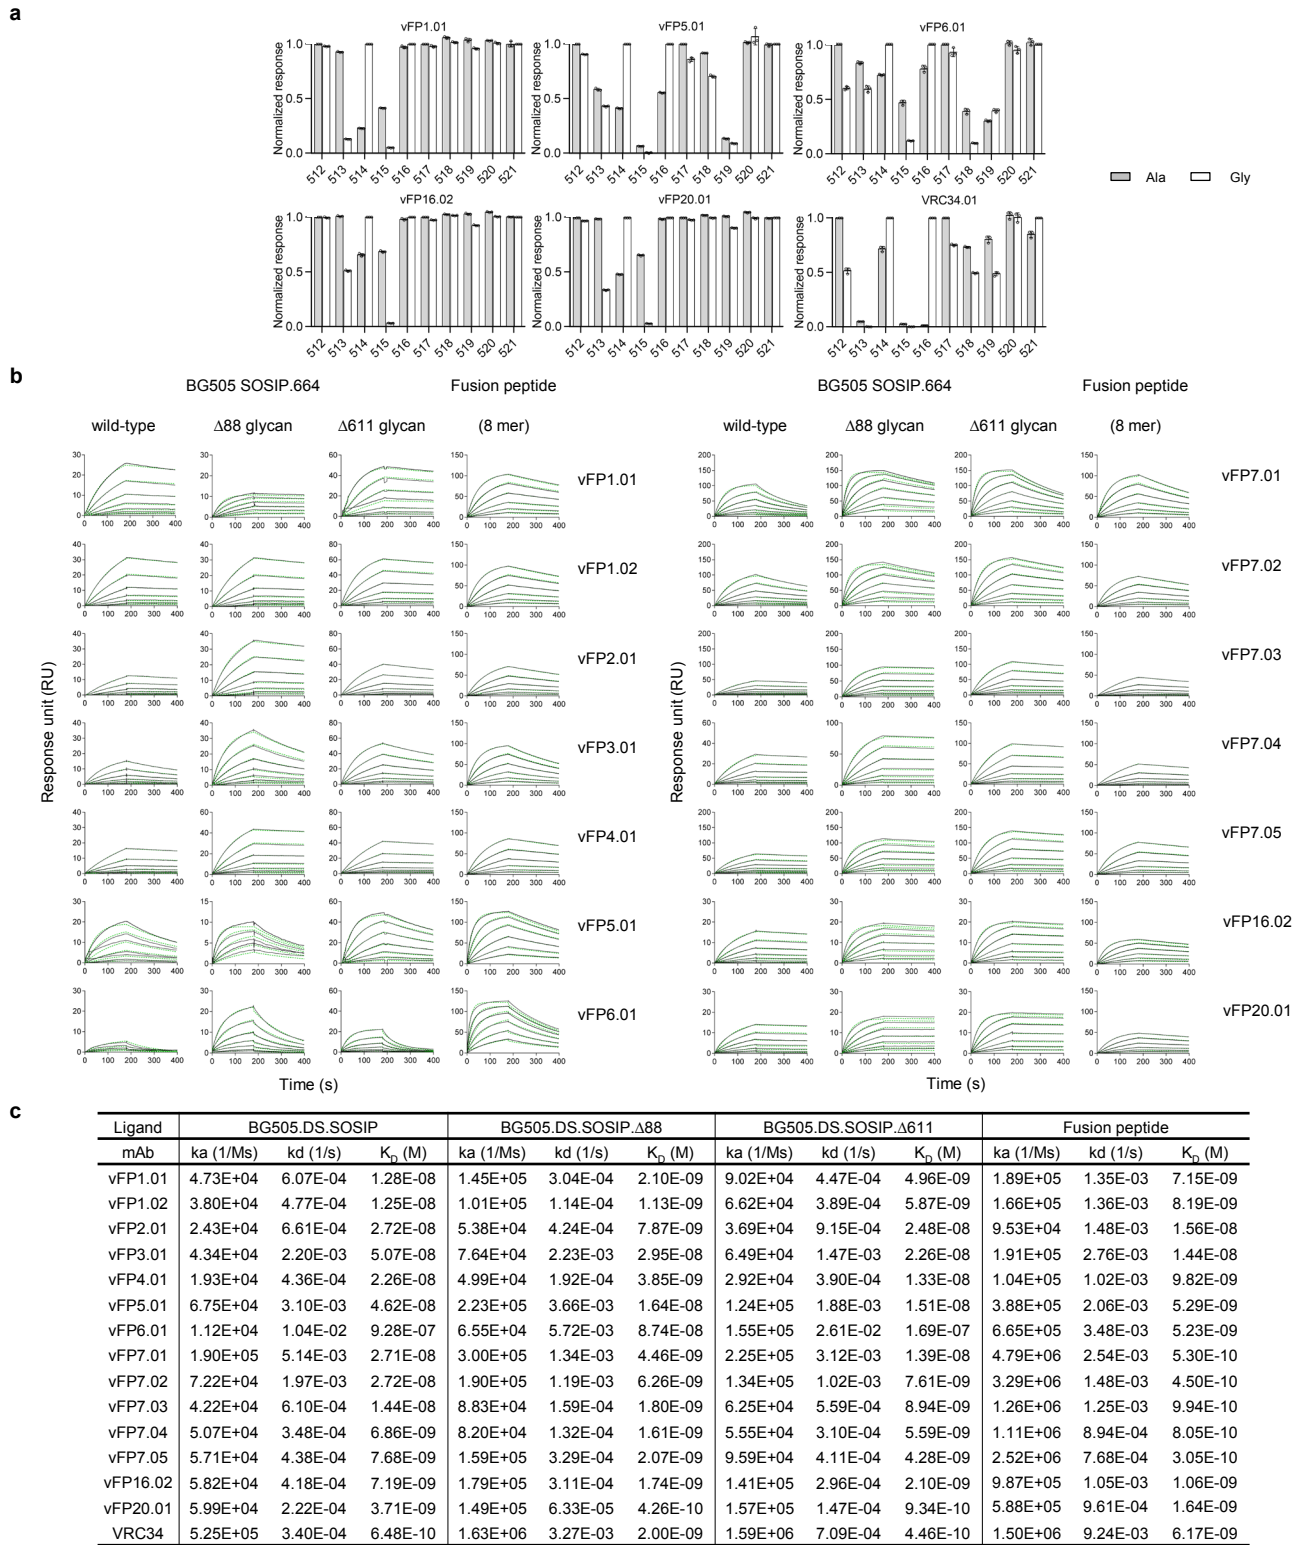

**Supplementary Figure 6. Binding of vaccine-elicited antibodies to HIV-1 Env trimers and His-tagged FP. a**, Bar plots of Ala/Gly scan. Binding of indicated antibodies to alanine (grey bars) and glycine (white bars) mutants are shown, normalized by binding to the wild-type sequence. FP amino acids are shown on x-axis. Experiments were performed in triplicate (n=3 independent experiments), error bars indicating mean with SD are plotted for each residue position in the overlaid scatter dot plot. See Supplementary Table 5 for numerical details and additional vFP1-class antibodies. **b**, SPR sensorgrams of vFP1.01, vFP1.02, vFP2.01, vFP3.01, vFP4.01, vFP5.01, vFP6.01, vFP7.01, vFP7.02, vFP7.03, vFP7.04, vFP7.05, vFP16.02 and vFP20.01 binding to wild type, glycan-deleted BG505.DS-SOSIP trimers and His-tagged FP. Blank-corrected sensorgrams were shown in black and fitted data using a 1:1 Langmuir model of binding were shown in green dashed lines. **c**, SPR constants of all first and second generation vFPs Fabs binding to wild type, glycan-deleted BG505.DS-SOSIP, and FPs.

**a**

| Mouse ID | Immunization |     |     | SVA-MLV          |                  | BG505 WT         |                  | BG505 Δ611 glycan |                  | BG505 Δ88+Δ611 glycans |                  | Hybridoma-identified antibodies<br>(All vFP1 class) |
|----------|--------------|-----|-----|------------------|------------------|------------------|------------------|-------------------|------------------|------------------------|------------------|-----------------------------------------------------|
|          | 1            | 2   | 3   | ID <sub>50</sub> | ID <sub>80</sub> | ID <sub>50</sub> | ID <sub>80</sub> | ID <sub>50</sub>  | ID <sub>80</sub> | ID <sub>50</sub>       | ID <sub>80</sub> |                                                     |
| 2586     | FP8          | FP8 |     | 23               | <20              | <20              | <20              | 78                | <20              | 239                    | <20              | vFP7.01-vFP7.03, vFP7.04-vFP7.07, vFP7.08           |
| 2602     | FP8          | FP8 |     | <20              | <20              | 60               | <20              | 275               | 22               | 575                    | 55               | vFP8.01, vFP8.02, vFP8.03                           |
| 1868     | T1           | FP8 | FP8 | 50               | <20              | <20              | <20              | 108               | 20               | 493                    | 65               | vFP1.01-vFP1.02, vFP2.01, vFP3.01, vFP4.01          |
| 1882     | T1           | FP8 | FP8 | 23               | <20              | <20              | <20              | 95                | <20              | 320                    | 26               | vFP9.01                                             |
| 1883     | T1           | FP8 | FP8 | 25               | <20              | <20              | <20              | 62                | <20              | 239                    | 29               | vFP10.01-vFP10.05, vFP11.01                         |

Key:  
FP8 = AVGIGAVF-KLH  
T1 = BG505 SOSIP

| ID <sub>50</sub> | ID <sub>80</sub> |
|------------------|------------------|
| <40              | <20              |
| 40-100           | 20-100           |
| 100-1000         |                  |

**b**

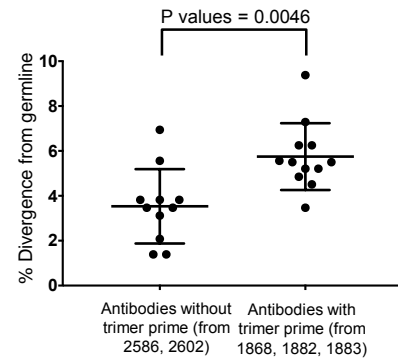

**c**

| Group # | Immunizations |          |          |          |    |    | Animal ID | BG505.N88Q.N611Q |                  | Key:<br>FP8 = AVGIGAVF-KLH<br>FP7 = AVGIGAV-KLH<br>FP6 = AVGIGA-KLH<br>T1 = BG505 SOSIP<br>T2 = BG505 DS SOSIP |
|---------|---------------|----------|----------|----------|----|----|-----------|------------------|------------------|----------------------------------------------------------------------------------------------------------------|
|         | 1             | 2        | 3        | 4        | 5  | 6  |           | ID <sub>50</sub> | ID <sub>80</sub> |                                                                                                                |
| 1       | T1            | FP8      | FP7      | FP6      | T2 | T2 | 4441      | 2029             | 280              |                                                                                                                |
|         |               |          |          |          |    |    | 4442      | 136              | <20              |                                                                                                                |
|         |               |          |          |          |    |    | 4443      | 2087             | 348              |                                                                                                                |
|         |               |          |          |          |    |    | 4444      | 4011             | 488              |                                                                                                                |
|         |               |          |          |          |    |    | 4445      | 178              | <20              |                                                                                                                |
| 2       | T1            | FP8      | FP8      | FP8      | T2 | T2 | 4446      | 1398             | 222              |                                                                                                                |
|         |               |          |          |          |    |    | 4447      | 87               | <20              |                                                                                                                |
|         |               |          |          |          |    |    | 4448      | 1127             | 325              |                                                                                                                |
|         |               |          |          |          |    |    | 4449      | 329              | 62               |                                                                                                                |
|         |               |          |          |          |    |    | 4450      | 1312             | 302              |                                                                                                                |
| 3       | T1            | KLH only | KLH only | KLH only | T2 | T2 | 4451      | <20              | <20              |                                                                                                                |
|         |               |          |          |          |    |    | 4452      | <20              | <20              |                                                                                                                |
|         |               |          |          |          |    |    | 4453      | <20              | <20              |                                                                                                                |
|         |               |          |          |          |    |    | 4454      | <20              | <20              |                                                                                                                |
|         |               |          |          |          |    |    | 4455      | <20              | <20              |                                                                                                                |

**d**

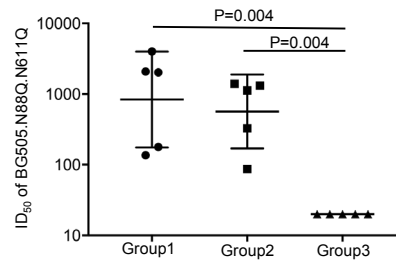

**e**

Week 18 sera neutralization of the guinea pig group, immunized with only 3x BG505.DS.SOSIP Env trimer

| Clade          | A                |                  | A                |                  | B                |                  | B                |                  | C                |                  | AE               |                  | BC               |                  | C                |                  | C                |                  | A                |                  | A                |                  | A                |                  | Wild type viruses neutralization #/10 in ID <sub>50</sub> |
|----------------|------------------|------------------|------------------|------------------|------------------|------------------|------------------|------------------|------------------|------------------|------------------|------------------|------------------|------------------|------------------|------------------|------------------|------------------|------------------|------------------|------------------|------------------|------------------|------------------|-----------------------------------------------------------|
| Glycan missing | Complete         | 241+611          | 448              | 241              | 241              | 241              | 241              | 88+241           | 241+611          | 88+241+611       | BG505 Δ88+611    | BG505 Δ88+611    | BG505 Δ88+611    |                  |                  |                                                           |
| Viruses        | KER2008.12       | Q23.17           | 3988.25          | BL01.DG          | 286.36           | CNE56            | CNE19            | 25710-2.43       | 0077.V1.C16      | BG505            | BG505 Δ88        | BG505 Δ611       | BG505 Δ88+611    | BG505 Δ88+611    | BG505 Δ88+611    | BG505 Δ88+611    |                  |                  |                  |                  |                  |                  |                  |                  |                                                           |
| Guinea pig ID  | ID <sub>50</sub> | ID <sub>80</sub> |                                                           |
| CGP606-1       | <20              | <20              | <20              | <20              | <20              | <20              | <20              | <20              | <20              | <20              | <20              | <20              | <20              | <20              | <20              | <20              | 6,910            | 765              | 7,461            | 745              | 8,931            | 2,474            | 8,494            | 1,249            | 1                                                         |
| CGP606-2       | <20              | <20              | <20              | <20              | <20              | <20              | <20              | <20              | <20              | <20              | <20              | <20              | <20              | <20              | <20              | <20              | 2,434            | 330              | 1,149            | 205              | 5,499            | 1,608            | 2,736            | 502              | 1                                                         |
| CGP606-3       | <20              | <20              | <20              | <20              | <20              | <20              | <20              | <20              | <20              | <20              | <20              | <20              | <20              | <20              | <20              | <20              | 20,000           | 3,972            | 20,000           | 4,045            | 20,000           | 4,914            | 20,000           | 5,018            | 1                                                         |
| CGP606-4       | <20              | <20              | *                | *                | *                | *                | *                | *                | *                | *                | *                | *                | <20              | <20              | <20              | <20              | 1,324            | 260              | 684              | 88               | 5,988            | 887              | 3,874            | 172              | 1                                                         |
| CGP606-5       | <20              | <20              | <20              | <20              | <20              | <20              | <20              | <20              | <20              | <20              | <20              | <20              | <20              | <20              | <20              | <20              | 1,315            | 288              | 611              | 119              | 5,394            | 2,026            | 2,583            | 309              | 1                                                         |

\* No enough sera to test

|            |
|------------|
| <20        |
| 20-100     |
| 100-1000   |
| 1000-10000 |
| >10000     |

**f**

Week 18 sera neutralization of the NHP group, immunized with only 3x BG505.DS.SOSIP Env trimer

| Clade          | A                |                  | A                |                  | B                |                  | B                |                  | C                |                  | AE               |                  | BC               |                  | C                |                  | C                |                  | A                |                  | A                |                  | A                |                  | Wild type viruses neutralization #/10 in ID <sub>50</sub> |       |     |   |
|----------------|------------------|------------------|------------------|------------------|------------------|------------------|------------------|------------------|------------------|------------------|------------------|------------------|------------------|------------------|------------------|------------------|------------------|------------------|------------------|------------------|------------------|------------------|------------------|------------------|-----------------------------------------------------------|-------|-----|---|
| Glycan missing | Complete         | 241+611          | 448              | 241              | 241              | 241              | 241              | 88+241           | 241+611          | 88+241+611       | BG505 Δ88+611    | BG505 Δ88+611    | BG505 Δ88+611    |                  |                  |                                                           |       |     |   |
| Viruses        | KER2008.12       | Q23.17           | 3988.25          | BL01.DG          | 286.36           | CNE56            | CNE19            | 25710-2.43       | 0077.V1.C16      | BG505            | BG505 D88        | BG505 D611       | BG505 Δ88+611    | BG505 Δ88+611    | BG505 Δ88+611    | BG505 Δ88+611    |                  |                  |                  |                  |                  |                  |                  |                  |                                                           |       |     |   |
| NHP ID         | ID <sub>50</sub> | ID <sub>80</sub> |                                                           |       |     |   |
| A12V163        | <20              | <20              | <20              | <20              | <20              | <20              | <20              | <20              | <20              | <20              | <20              | <20              | <20              | <20              | <20              | <20              | <20              | <20              | <20              | <20              | <20              | <20              | <20              | <20              | 0                                                         |       |     |   |
| A12V193        | <20              | <20              | <20              | <20              | <20              | <20              | <20              | <20              | <20              | <20              | <20              | <20              | <20              | <20              | <20              | <20              | <20              | <20              | <20              | 66               | <20              | 42               | <20              | 139              | 27                                                        | 363   | 74  | 1 |
| A12V168        | <20              | <20              | <20              | <20              | <20              | <20              | <20              | <20              | <20              | <20              | <20              | <20              | <20              | <20              | <20              | <20              | <20              | <20              | <20              | 455              | 155              | 307              | 104              | 572              | 159                                                       | 742   | 226 | 3 |
| A12V049        | <20              | <20              | <20              | <20              | <20              | <20              | <20              | <20              | <20              | <20              | <20              | <20              | <20              | <20              | <20              | <20              | <20              | <20              | <20              | 1,034            | 272              | 787              | 251              | 909              | 278                                                       | 1,280 | 447 | 1 |
| A12V145        | <20              | <20              | <20              | <20              | <20              | <20              | <20              | <20              | <20              | <20              | <20              | <20              | <20              | <20              | <20              | <20              | <20              | <20              | <20              | <20              | <20              | <20              | 34               | <20              | 70                                                        | <20   | 0   |   |

|            |
|------------|
| <20        |
| 20-100     |
| 100-1000   |
| 1000-10000 |
| >10000     |

**Supplementary Figure 7. Comparator mouse, guinea pig and NHP immunization experiments.** **a**, FP8-KLH mouse immunizations with or without Env-trimer prime. Sera neutralization and antibody isolation is shown. **b**, Two tailed Mann-Whitney comparing of vFP1-class antibody SHM with and without Env-trimer prime (n=11 for Antibodies without trimer prime, n= 12 for Antibodies with trimer prime, means ± s.d were displayed). **(c-d)** Repeat immunization experiment of mouse ID 2716 with control. **c**, Experimental mouse immunization schema and neutralization on Δ88+611 BG505 virus. **d**, Statistical comparison, by single-tailed Mann-Whitney; Geometric mean and geometric SD were displayed, n= 5 animals. **e**, Week 18 sera neutralization of a guinea pig comparator group, immunized with 3x BG505 DS-SOSIP Env trimer at week 0, 4 and 16. **f**, Week 18 sera neutralization of a NHP comparator group, immunized with 3x BG505 DS-SOSIP Env trimer at week 0, 4 and 16.

**a**

| Immunization regimens |              |                     |      |      |              | SVA MLV         |      |      | BG505 WT   |      |      | BG505 Δ611 glycan |        |       | BG505 Δ88+Δ611 glycans |        |        | Hybridoma-identified antibodies |      |      |            |                                                           |              |                  |
|-----------------------|--------------|---------------------|------|------|--------------|-----------------|------|------|------------|------|------|-------------------|--------|-------|------------------------|--------|--------|---------------------------------|------|------|------------|-----------------------------------------------------------|--------------|------------------|
| Mouse ID              | Trimer prime | FP-KLH immunization |      |      | Trimer Boost | Days post-prime | ID50 | ID80 | Max % Neut | ID50 | ID80 | Max % Neut        | ID50   | ID80  | Max % Neut             | ID50   | ID80   | Max % Neut                      | ID50 | ID80 | Max % Neut | Cross-clade                                               | ΔGlycan-only | Non-neutralizing |
| 2703                  | T1           | FP6                 | FP6  | FP6  |              | 71              | <20  | <20  | 36         | <20  | <20  | 41                | 221    | <20   | 79                     | 471    | 48     | 85                              |      |      |            | <i>vFP12.01-06</i>                                        |              |                  |
| 2706                  | T1           | FP7                 | FP7  | FP7  |              | 71              | <20  | <20  | 50         | <20  | <20  | 36                | 66     | <20   | 75                     | 210    | 27     | 83                              |      |      |            | <i>vFP13.01-03</i> , <i>vFP14.01-02</i>                   |              |                  |
| 2711                  | T1           | FP9                 | FP9  | FP9  |              | 74              | <20  | <20  | 49         | <20  | <20  | 36                | 441    | 74    | 90                     | 834    | 139    | 94                              |      |      |            | <i>vFP15.01-07</i>                                        |              |                  |
| 2712                  | T1           | FP10                | FP10 | FP10 |              | 80              | 195  | <20  | 81         | 150  | <20  | 70                | 155    | 49    | 81                     | 202    | 54     | 86                              |      |      |            | <i>vFP16.01-02</i>                                        |              |                  |
| 2713                  | T1           | FP10                | FP10 | FP10 |              | 80              | 128  | <20  | 74         | 156  | <20  | 68                | 169    | 21    | 81                     | 182    | 53     | 86                              |      |      |            | <i>vFP17.01</i>                                           |              |                  |
| 2714                  | T1           | FP10                | FP10 | FP10 |              | 78              | 90   | <20  | 63         | 110  | <20  | 73                | 269    | 41    | 91                     | 282    | 78     | 92                              |      |      |            | <i>vFP18.01-02</i> , <i>vFP19.01-02</i>                   |              |                  |
| 2716                  | T1           | FP8                 | FP7  | FP6  | T2           | 91              | <20  | <20  | 35         | 155  | 38   | 86                | 33,118 | 8,844 | 100                    | 77,279 | 17,983 | 99                              |      |      |            | <i>vFP20.01</i>                                           |              |                  |
| 2717                  | T1           | FP8                 | FP7  | FP6  |              | 74              | <20  | <20  | 38         | <20  | <20  | 40                | 251    | 48    | 89                     | 574    | 68     | 89                              |      |      |            | <i>vFP21.01</i>                                           |              |                  |
| 2718                  | T1           | FP8                 | FP9  | FP10 | T2           | 92              | <20  | <20  | 45         | 20   | <20  | 50                | 1,732  | 187   | 95                     | 4,292  | 382    | 95                              |      |      |            | <i>vFP22.01</i>                                           |              |                  |
| 2719                  | T1           | FP8                 | FP9  | FP10 |              | 78              | <20  | <20  | 35         | <20  | <20  | 47                | 123    | 22    | 82                     | 241    | 67     | 94                              |      |      |            | <i>vFP23.01-03</i> , <i>vFP24.01</i> , <i>vFP25.01-18</i> |              |                  |
| 2787                  | T1           | FP8                 | FP8  | FP8  |              | 68              | <20  | <20  | 34         | <20  | <20  | 44                | 178    | <20   | 81                     | 314    | 25     | 82                              |      |      |            | <i>vFP26.01-04</i>                                        |              |                  |
| 2788                  | T1           | FP8                 | FP8  | FP8  | FP8          | 90              | <20  | <20  | 33         | <20  | <20  | 25                | 89     | <20   | 78                     | 167    | <20    | 80                              |      |      |            | <i>vFP27.01</i>                                           |              |                  |
| 2789                  | T1           | FP8                 | FP8  | FP8  | FP8          | 91              | <20  | <20  | 39         | <20  | <20  | 36                | 250    | 28    | 84                     | 342    | 67     | 91                              |      |      |            | <i>vFP28.01</i> , <i>vFP29.01</i>                         |              |                  |
| 2790                  | T1           | FP8                 | FP8  | FP8  | T2           | 68              | <20  | <20  | 34         | <20  | <20  | 41                | 1,649  | 54    | 87                     | 772    | 148    | 95                              |      |      |            | <i>vFP30.01-02</i>                                        |              |                  |
| 2791                  | T1           | FP8                 | FP8  | FP8  | T2           | 69              | <20  | <20  | 42         | 39   | <20  | 62                | 3,174  | 416   | 96                     | 4,635  | 855    | 97                              |      |      |            | <i>vFP31.01</i>                                           |              |                  |
| 2792                  | T1           | FP8                 | FP8  | FP8  | T2           | 69              | <20  | <20  | 35         | 29   | <20  | 57                | 1,243  | 297   | 98                     | 3,608  | 789    | 98                              |      |      |            | <i>vFP32.01-07</i>                                        |              |                  |

Key:  
 FP6 = AVGIGA  
 FP7 = AVGIGAV  
 FP8 = AVGIGAVF  
 FP9 = AVGIGAVFLG  
 FP10 = AVGIGAVFLG  
 T1 = BG505 SOSIP  
 T2 = BG505 DS-SOSIP

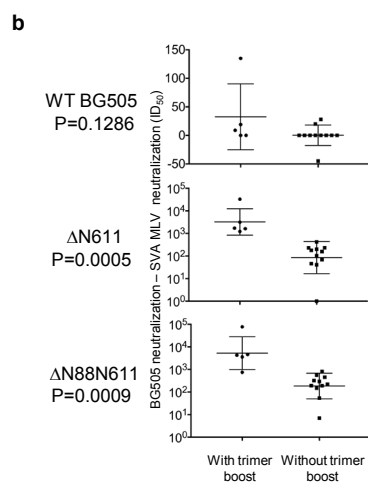

**c Serum neutralization**

| Clade          | A        |            | A        |          | B        |          | B        |          | C        |            | A           |             | AE          |             | BC          |             | C           |             | C           |      |     |     |
|----------------|----------|------------|----------|----------|----------|----------|----------|----------|----------|------------|-------------|-------------|-------------|-------------|-------------|-------------|-------------|-------------|-------------|------|-----|-----|
| Glycan missing | Complete | Complete   | Complete | Complete | Complete | Complete | Complete | Complete | Complete | Complete   | 241         | 241/611     | 241/611     | 448         | 448         | 25710-2.43  | 25710-2.43  | 0077.V1.C16 | 0077.V1.C16 |      |     |     |
| Viruses        | SVA-MLV  | KER2008.12 | Q23.17   | 3988.25  | BL01.DG  | 286.36   | BG505 WT | CNE56    | CNE19    | 25710-2.43 | 0077.V1.C16 |      |     |     |
| Mouse ID       | ID50     | ID80       | ID50     | ID80     | ID50     | ID80     | ID50     | ID80     | ID50     | ID80       | ID50        | ID80        | ID50        | ID80        | ID50        | ID80        | ID50        | ID80        | ID50        | ID80 |     |     |
| 2716           | <20      | <20        | 60       | <20      | 242      | <20      | 339      | 22       | 158      | 46         | 90          | <20         | 155         | 38          | 822         | 222         | 277         | 39          | 843         | 174  | 157 | 41  |
| 2718           | <20      | <20        | 28       | <20      | 41       | <20      | 40       | <20      | 36       | <20        | 26          | <20         | <20         | <20         | 59          | <20         | 32          | <20         | 119         | 32   | 35  | <20 |
| 2790           | <20      | <20        | 22       | <20      | 37       | <20      | 42       | <20      | 43       | <20        | 23          | <20         | <20         | <20         | 65          | <20         | 76          | <20         | 76          | <20  | 23  | <20 |
| 2791           | <20      | <20        | 39       | <20      | 61       | <20      | 69       | <20      | 73       | <20        | 45          | <20         | 39          | <20         | 75          | 25          | 61          | <20         | 134         | 26   | 45  | <20 |
| 2792           | <20      | <20        | 26       | <20      | 37       | <20      | 43       | <20      | 69       | 21         | 36          | <20         | 29          | <20         | 46          | 21          | 50          | <20         | 157         | 40   | 34  | <20 |

**Supplementary Figure 8. Second-generation murine immunization schema and elicited serum neutralization. a**, 16 mice and 11 immunization schema (left), with neutralization (middle) and hybridoma-identified antibodies (right). Names for vFP1-class antibodies are italicized and colored according to neutralization properties as indicated. **b**, Trimer boost induced significantly higher serum neutralization titers by two-tailed Mann-Whitney. n=5 for “with trimer boost” group and n=11 for “without trimer group boost”; mean and SD were displayed for WT BG505 panel, and geometric mean and geometric SD were displayed for the other two panels. **c**, Neutralization by trimer-boosted sera on 10 wildtype isolates, 5 with complete glycans around FP and 5 naturally missing select glycans as specified, with ID50/ID80 colored as in (a). **d**, Neutralization dendrograms. Top row: 208-isolate panel for vaccine-elicited antibodies vFP16.02 and vFP20.01,



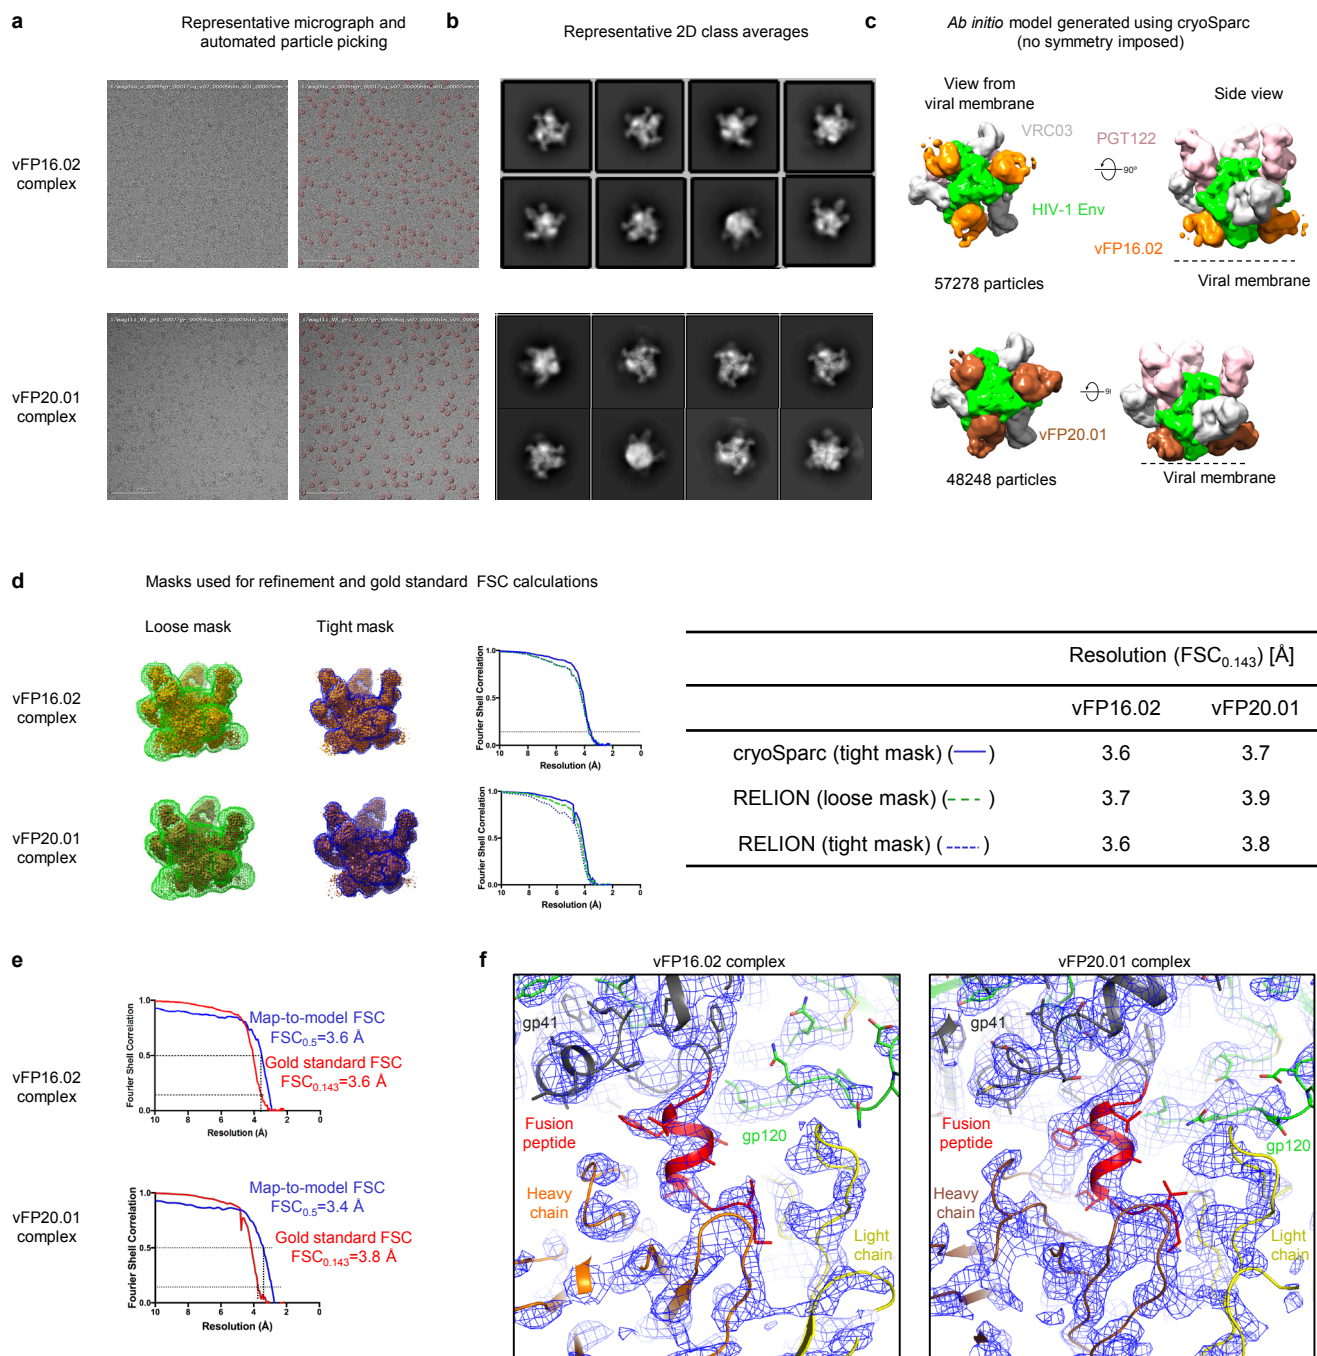

**Supplementary Figure 9. Cryo-EM structural details for reconstructions of better than 4 Å resolution.** (a-f) Details of cryo-EM structures of vFP16.02-BG505 DS-SOSIP-VRC03-PGT122 and vFP20.01-BG505 DS-SOSIP-VRC03-PGT122 complexes. **a**, Representative micrograph (left) with particles picked with DogPicker shown in red circles (right). **b**, Representative 2D class averages. **c**, *Ab initio* models generated using cryoSparc. **d**, Refined map in orange with the mask used for the final iteration of cryoSparc refinement (green) and for FSC calculation (blue) shown as mesh. FSC plots and resolution values reported by cryoSparc and RELION according to the gold standard FSC<sub>0.143</sub> criterion (FSC<sub>0.143</sub> shown as dotted line). **e**, Gold standard (red) and map-to-model (blue) FSC correlation curves. The map-to-model FSC curve was calculated for protein residues within the complex excluding the antibody constant domains. **f**, Zoomed-in view of the region around the fusion peptide with electron density shown in blue mesh. Cryo-EM data collection was performed once for each structure. The represented images in (a and b) was derived from the analysis of many particles in many images. Additional details on cryo-EM data collection, such as total number of particles, number of images, can be found in Supplementary Table 4.

**a** Representative electron density in vFP16.02.DS.SOSIP-VRC03-PGT122 reconstruction

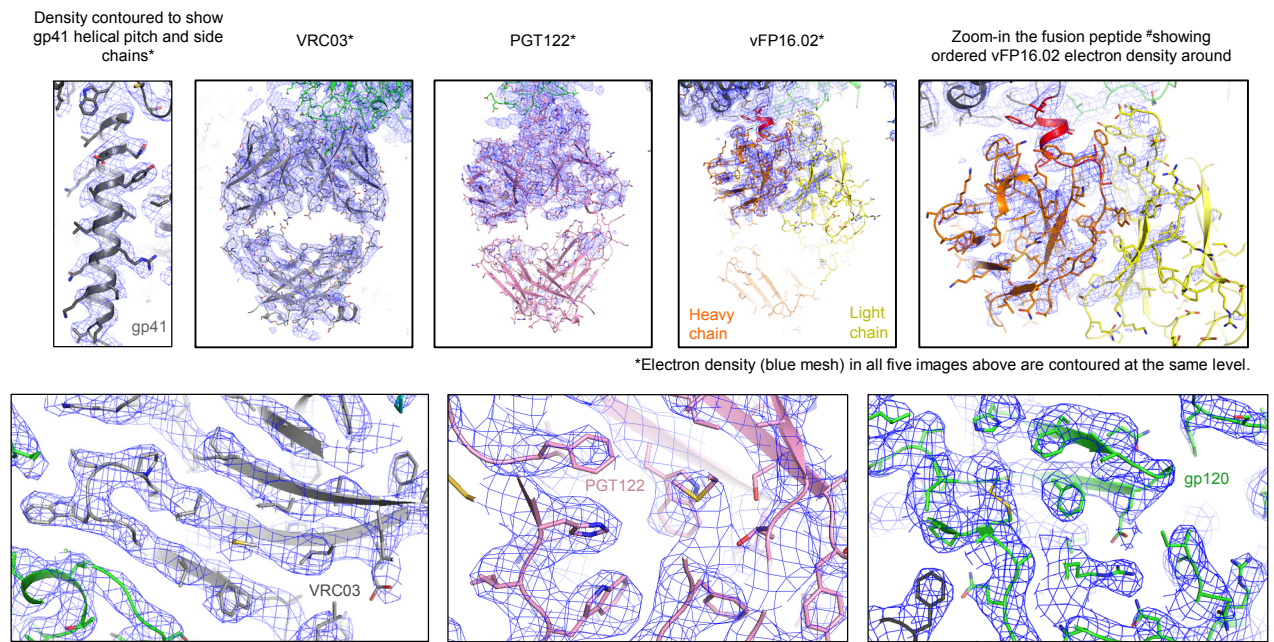

**b**

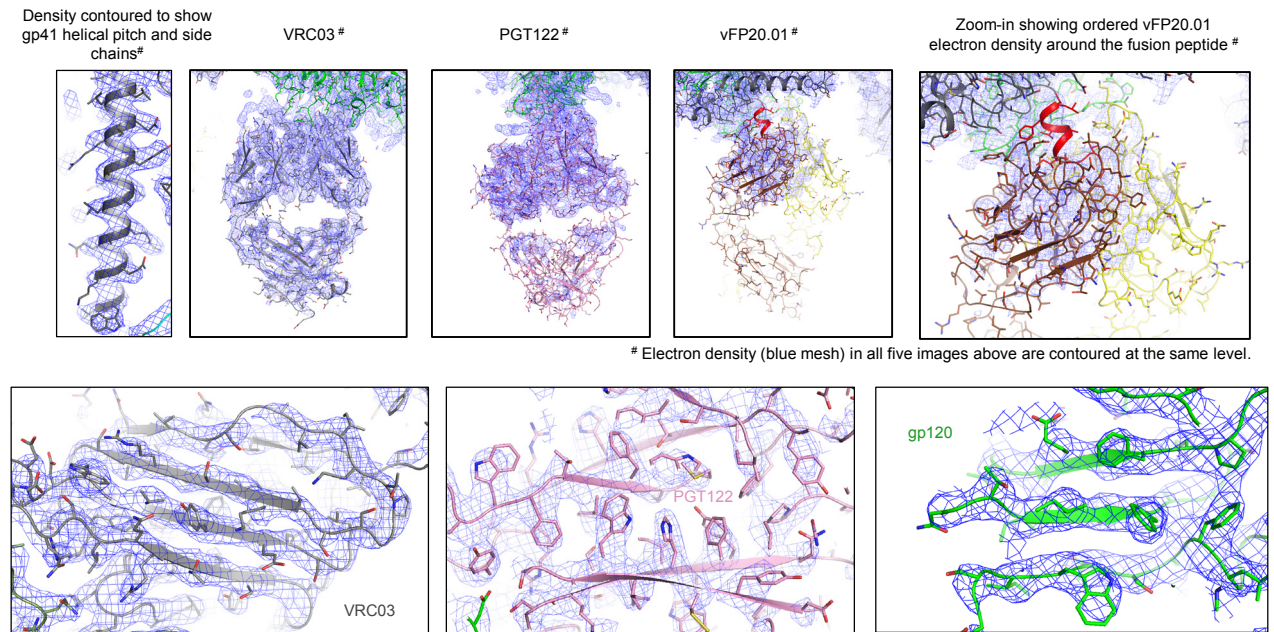

**Supplementary Figure 10. Cryo-EM reconstructions reveal focused recognition of the HIV-1 fusion peptide by antibodies vFP16.02 and vFP20.01. a, Top panel. Focused recognition of fusion peptide by vFP16.01. Bottom panel. Representative electron density plots from different regions of the vFP16.02-DS.SOSIP-VRC03-PGT122 structure. b, Same as a, but for the vFP20.01-DS.SOSIP-VRC03-PGT122 complex.**

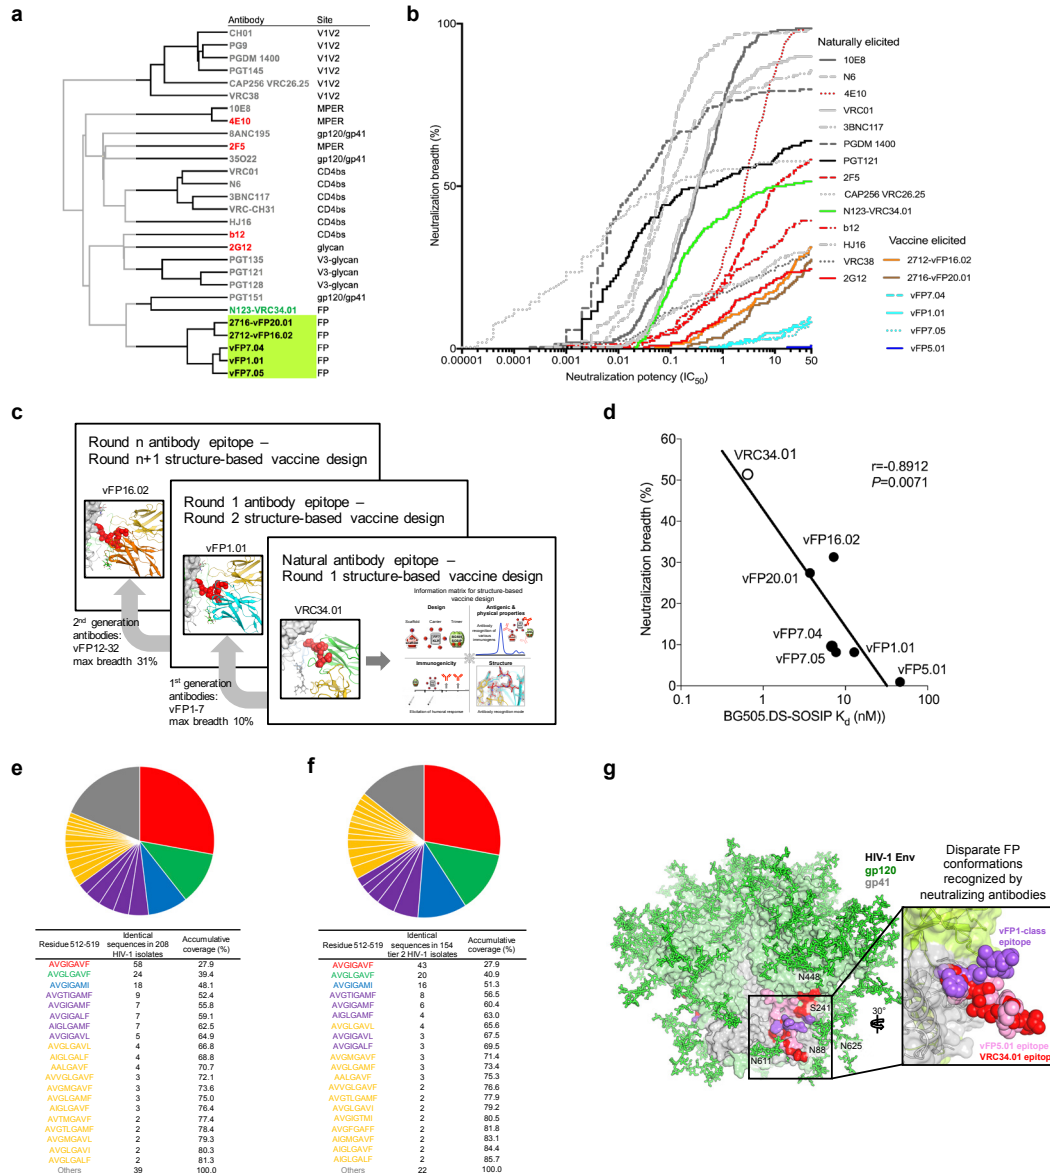

**Supplementary Figure 11. Iterative epitope-based vaccine development to achieve neutralization of heterologous viral strains.** **a**, Dendrogram representing neutralization fingerprints shows vaccine-elicited antibodies to cluster with FP antibodies isolated from HIV-1 infected donors, though as a separate group. **b**, Comparison of HIV-1-neutralization breadth and potency by antibodies isolated from HIV-1 infected donors to vaccine-elicited antibodies. **c**, Schematic showing process of iterative structure-based vaccine design, which involves analysis of elicited antibodies to provide insight into the design and improvement of immunogens and immunization regimens for subsequent cycles of improvement. **d**, Neutralization breadth of FP-directed antibodies versus affinity for stabilized Env trimer. Pearson correlation was displayed,  $n=7$  antibodies. **e**, Sequence diversity of the N-terminal eight residues of FP (residue 512 to 519) in the 208-isolate panel, in pie chart format (top) and table format ranked by their prevalence (bottom). The accumulative coverage of the sequence diversity of these five residues is also shown. **f**, Same as (e), but with 154 isolates resistant to neutralization by CD4-induced antibodies, V3-directed antibodies, and F105 antibody. **g**, vFP-defined site of vulnerability allows for target-site conformational diversity.

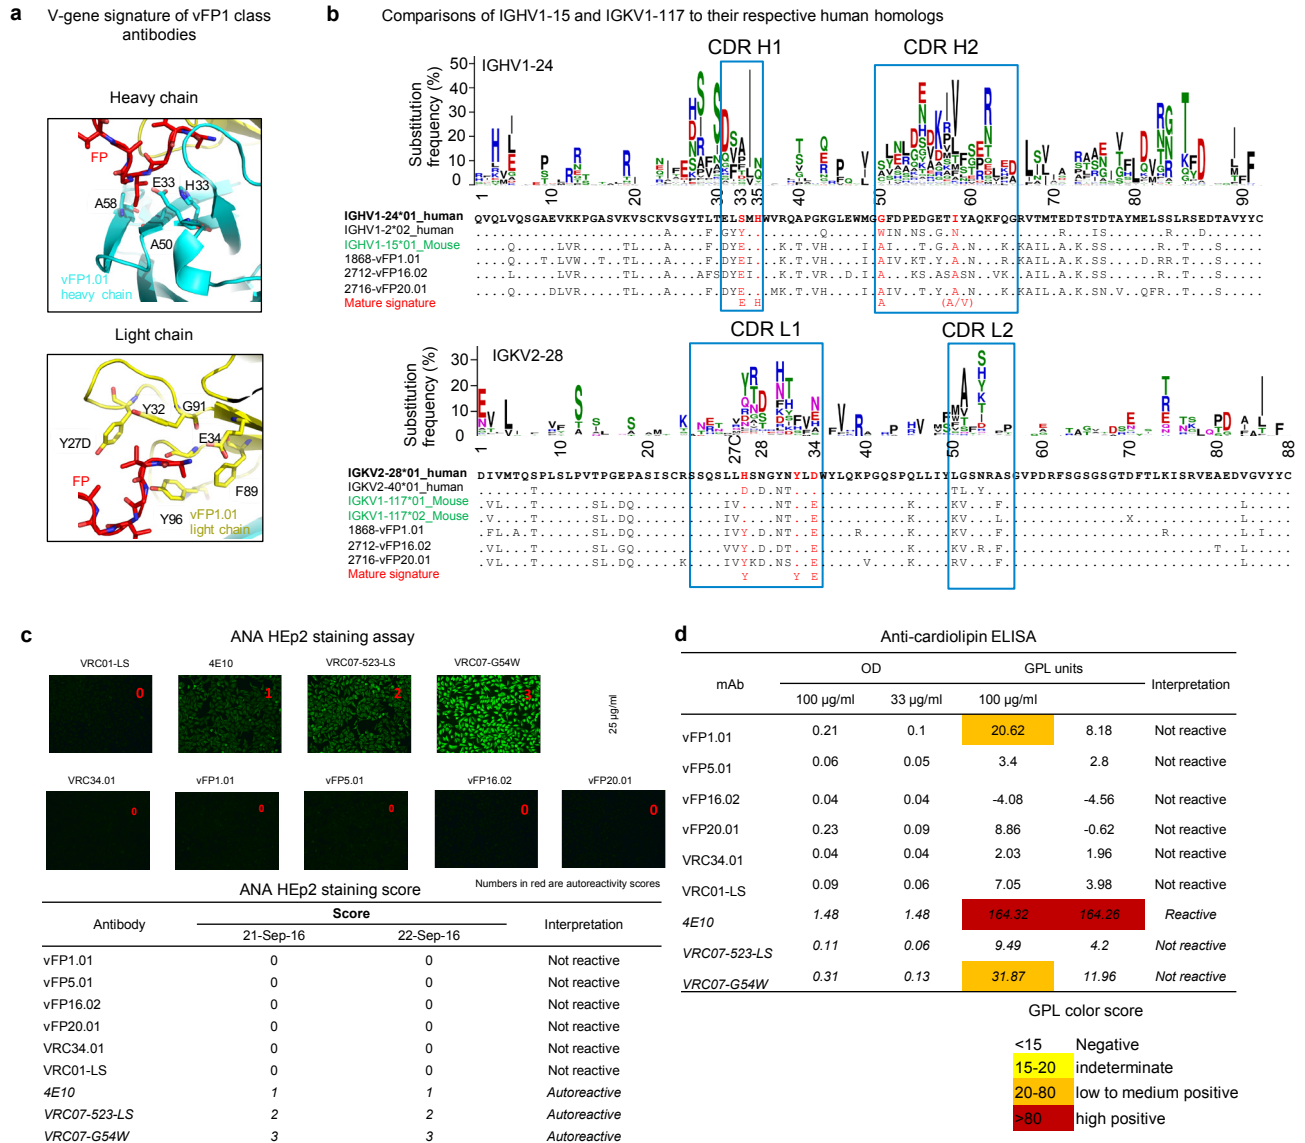

**Supplementary Figure 12. vFP1-class antibodies: V-gene similarity to human homologues and autoreactivity.** **a**, V-gene signature of vFP1 class antibodies. Signature residues for heavy chain (top) and light chain (bottom) are shown in sticks and labeled. **b**, Comparisons of IGHV1-15 and IGKV1-117 to their respective human homologs identified by IMGT/V-QUEST and mutation profile of human gene IGHV1-24 and IGKV2-28. Compared to mouse IGHV1-15, human IGHV1-24 contains the H35 signature, and the A50 and A/V58 signatures can be reproduced by somatic hypermutation with high frequencies (See gene-specific substitution profile of IGHV1-24 built from 190 mature human antibody lineages, with one sequence per lineage). This suggested similar key signatures may be reproduced by human antibodies. However, the alignment also showed multiple germline gene positions are diversified between the homolog genes, further investigations are required to understand whether they will affect FP recognition. The mouse IGKV1-117 was aligned to two human kappa chain genes, IGKV2-28 and IGKV2-40. Similar to mouse IGKV1-117, the IGKV2-28 also has a His-Ser-Asn motif in CDR L1. We built a substitution profile for IGKV2-28 using 104 antibody lineages derived from repertoires of three healthy human donors. The substitution profile showed that the key signatures of vFP1 antibodies, Y27d, Y32, and E34 are either germline residue or mutations with high frequency in human IGKV2-28 antibodies, suggesting the signatures observed in the vFP1 antibodies can be obtained with high frequency. V gene positions numbered using Kabat system. **(c-d)** Autoreactivity analysis of FP-directed antibodies. **c**, ANA Hep-2 staining analysis showed none of the five FP-directed antibodies are autoreactive. Control antibodies with known autoreactivity are italicized. The experiment was performed twice (n=2) independently. **d**, Anti-cardiolipin ELISA showed none of the three FP-directed antibodies to be reactive. Control values italicized as in (c). The experiment was performed only once.





**Supplementary Table 2. V(D)J Recombination of vFP lineages. (continued from prior page)**

**b**

1868 Light chain 2706 Light chain

|         |         | Light chain |         |         |         |         |         |         |
|---------|---------|-------------|---------|---------|---------|---------|---------|---------|
|         |         | vFP1.01     | vFP1.02 | vFP2.01 | vFP3.01 | vFP4.01 | vFP5.01 | vFP6.01 |
| L       | H       |             |         |         |         |         |         |         |
|         | vFP1.01 |             | 0       | 15      | 15      | 0       | 132     | 93      |
| vFP1.02 | 0       |             | 15      | 15      | 0       | 132     | 93      |         |
| vFP2.01 | 20      | 20          |         | 0       | 15      | 143     | 96      |         |
| vFP3.01 | 17      | 17          | 3       |         | 15      | 143     | 96      |         |
| vFP4.01 | 41      | 41          | 56      | 58      |         | 132     | 93      |         |
| vFP5.01 | 177     | 177         | 174     | 174     | 179     |         | 140     |         |
| vFP6.01 | 81      | 81          | 63      | 66      | 76      | 173     |         |         |

|          |          | Light chain |          |          |          |          |
|----------|----------|-------------|----------|----------|----------|----------|
|          |          | vFP13.01    | vFP13.02 | vFP13.03 | vFP14.01 | vFP14.02 |
| L        | H        |             |          |          |          |          |
|          | vFP13.01 |             | 0        | 0        | 65       | 65       |
| vFP13.02 | 13       |             | 0        | 65       | 65       |          |
| vFP13.03 | 13       | 0           |          | 65       | 65       |          |
| vFP14.01 | 66       | 62          | 62       |          | 0        |          |
| vFP14.02 | 85       | 60          | 60       | 2        |          |          |

Heavy chain

1883 Light chain 2714 Light chain 2789 Light chain

|          |          | Light chain |          |          |          |          |
|----------|----------|-------------|----------|----------|----------|----------|
|          |          | vFP10.01    | vFP10.02 | vFP10.03 | vFP10.04 | vFP11.01 |
| L        | H        |             |          |          |          |          |
|          | vFP10.01 |             | 0        | 0        | 0        | 0        |
| vFP10.02 | 1        |             | 0        | 0        | 0        | 0        |
| vFP10.03 | 3        | 2           |          | 0        | 0        | 0        |
| vFP10.04 | 3        | 2           | 0        |          | 0        | 0        |
| vFP10.05 | 1        | 0           | 2        | 2        |          | 0        |
| vFP11.01 | 31       | 31          | 31       | 31       | 31       |          |

|          |          | Light chain |          |          |          |
|----------|----------|-------------|----------|----------|----------|
|          |          | vFP18.01    | vFP18.02 | vFP19.01 | vFP19.02 |
| L        | H        |             |          |          |          |
|          | vFP18.01 |             | 0        | 73       | 73       |
| vFP18.02 | 0        |             | 73       | 73       |          |
| vFP19.01 | 148      | 148         |          | 0        |          |
| vFP19.02 | 148      | 148         | 0        |          |          |

|          |          | Light chain |          |
|----------|----------|-------------|----------|
|          |          | vFP28.01    | vFP29.01 |
| L        | H        |             |          |
|          | vFP28.01 |             | 0        |
| vFP29.01 | 17       |             |          |

Heavy chain

2719 Light chain

|          |          | Light chain |          |          |          |          |          |          |          |          |          |          |          |          |          |          |          |          |          |          |          |          |          |
|----------|----------|-------------|----------|----------|----------|----------|----------|----------|----------|----------|----------|----------|----------|----------|----------|----------|----------|----------|----------|----------|----------|----------|----------|
|          |          | vFP23.01    | vFP23.02 | vFP23.03 | vFP24.01 | vFP25.01 | vFP25.02 | vFP25.03 | vFP25.04 | vFP25.05 | vFP25.06 | vFP25.07 | vFP25.08 | vFP25.09 | vFP25.10 | vFP25.11 | vFP25.12 | vFP25.13 | vFP25.14 | vFP25.15 | vFP25.16 | vFP25.17 | vFP25.18 |
| L        | H        |             |          |          |          |          |          |          |          |          |          |          |          |          |          |          |          |          |          |          |          |          |          |
|          | vFP23.01 |             | 0        | 0        | 65       | 0        | 8        | 8        | 8        | 8        | 8        | 8        | 8        | 8        | 8        | 8        | 8        | 8        | 8        | 8        | 8        | 8        | 8        |
| vFP23.02 | 0        |             | 0        | 65       | 0        | 8        | 8        | 8        | 8        | 8        | 8        | 8        | 8        | 8        | 8        | 8        | 8        | 8        | 8        | 8        | 8        | 8        | 8        |
| vFP23.03 | 0        | 0           |          | 65       | 0        | 8        | 8        | 8        | 8        | 8        | 8        | 8        | 8        | 8        | 8        | 8        | 8        | 8        | 8        | 8        | 8        | 8        | 8        |
| vFP24.01 | 80       | 80          | 80       |          | 65       | 73       | 73       | 73       | 73       | 73       | 73       | 73       | 73       | 73       | 73       | 73       | 73       | 73       | 73       | 73       | 73       | 73       | 73       |
| vFP25.01 | 85       | 85          | 85       | 62       |          | 8        | 8        | 8        | 8        | 8        | 8        | 8        | 8        | 8        | 8        | 8        | 8        | 8        | 8        | 8        | 8        | 8        | 8        |
| vFP25.02 | 85       | 85          | 85       | 62       | 0        |          | 0        | 0        | 0        | 0        | 0        | 0        | 0        | 0        | 0        | 0        | 0        | 0        | 0        | 0        | 0        | 0        | 0        |
| vFP25.03 | 85       | 85          | 85       | 62       | 0        | 0        |          | 0        | 0        | 0        | 0        | 0        | 0        | 0        | 0        | 0        | 0        | 0        | 0        | 0        | 0        | 0        | 0        |
| vFP25.04 | 85       | 85          | 85       | 62       | 0        | 0        | 0        |          | 0        | 0        | 0        | 0        | 0        | 0        | 0        | 0        | 0        | 0        | 0        | 0        | 0        | 0        | 0        |
| vFP25.05 | 85       | 85          | 85       | 62       | 0        | 0        | 0        | 0        |          | 0        | 0        | 0        | 0        | 0        | 0        | 0        | 0        | 0        | 0        | 0        | 0        | 0        | 0        |
| vFP25.06 | 85       | 85          | 85       | 62       | 0        | 0        | 0        | 0        | 0        |          | 0        | 0        | 0        | 0        | 0        | 0        | 0        | 0        | 0        | 0        | 0        | 0        | 0        |
| vFP25.07 | 85       | 85          | 85       | 62       | 0        | 0        | 0        | 0        | 0        | 0        |          | 0        | 0        | 0        | 0        | 0        | 0        | 0        | 0        | 0        | 0        | 0        | 0        |
| vFP25.08 | 85       | 85          | 85       | 62       | 0        | 0        | 0        | 0        | 0        | 0        | 0        |          | 0        | 0        | 0        | 0        | 0        | 0        | 0        | 0        | 0        | 0        | 0        |
| vFP25.09 | 85       | 85          | 85       | 62       | 0        | 0        | 0        | 0        | 0        | 0        | 0        | 0        |          | 0        | 0        | 0        | 0        | 0        | 0        | 0        | 0        | 0        | 0        |
| vFP25.10 | 85       | 85          | 85       | 62       | 0        | 0        | 0        | 0        | 0        | 0        | 0        | 0        | 0        |          | 0        | 0        | 0        | 0        | 0        | 0        | 0        | 0        | 0        |
| vFP25.11 | 85       | 85          | 85       | 62       | 0        | 0        | 0        | 0        | 0        | 0        | 0        | 0        | 0        | 0        |          | 0        | 0        | 0        | 0        | 0        | 0        | 0        | 0        |
| vFP25.12 | 85       | 85          | 85       | 62       | 0        | 0        | 0        | 0        | 0        | 0        | 0        | 0        | 0        | 0        | 0        |          | 0        | 0        | 0        | 0        | 0        | 0        | 0        |
| vFP25.13 | 85       | 85          | 85       | 62       | 0        | 0        | 0        | 0        | 0        | 0        | 0        | 0        | 0        | 0        | 0        | 0        |          | 0        | 0        | 0        | 0        | 0        | 0        |
| vFP25.14 | 83       | 83          | 83       | 60       | 21       | 21       | 21       | 21       | 21       | 21       | 21       | 21       | 21       | 21       | 21       | 21       | 21       |          | 0        | 0        | 0        | 0        | 0        |
| vFP25.15 | 86       | 86          | 86       | 63       | 1        | 1        | 1        | 1        | 1        | 1        | 1        | 1        | 1        | 1        | 1        | 1        | 1        | 1        | 22       |          | 0        | 0        | 0        |
| vFP25.16 | 81       | 81          | 81       | 66       | 10       | 10       | 10       | 10       | 10       | 10       | 10       | 10       | 10       | 10       | 10       | 10       | 10       | 10       | 22       | 11       |          | 0        | 0        |
| vFP25.17 | 85       | 85          | 85       | 62       | 0        | 0        | 0        | 0        | 0        | 0        | 0        | 0        | 0        | 0        | 0        | 0        | 0        | 0        | 21       | 1        | 10       |          | 0        |
| vFP25.18 | 85       | 85          | 85       | 62       | 0        | 0        | 0        | 0        | 0        | 0        | 0        | 0        | 0        | 0        | 0        | 0        | 0        | 0        | 21       | 1        | 10       | 0        |          |

Heavy chain

For each mouse with more than one vFP lineage, we performed pairwise comparison of nucleotide differences separating germline versions of heavy (blue) and light (yellow) chain variable regions. Mouse ID is listed in upper left of each table.





### Supplementary Table 3. vFP antibody and sera neutralization.

#### b. vFP antibody neutralization against a panel of 10 isolates.

| HIV strains   | IC50       |        |         |         |        |              |       |       |            |             | IC80       |        |         |         |        |              |       |       |            |             |
|---------------|------------|--------|---------|---------|--------|--------------|-------|-------|------------|-------------|------------|--------|---------|---------|--------|--------------|-------|-------|------------|-------------|
|               | KER2008.12 | Q23.17 | 3988.25 | BL01.DG | 286.36 | BG505.W6M.C2 | CNE56 | CNE19 | 25710-2.43 | 0077.V1.C16 | KER2008.12 | Q23.17 | 3988.25 | BL01.DG | 286.36 | BG505.W6M.C2 | CNE56 | CNE19 | 25710-2.43 | 0077.V1.C16 |
| 1868-vFP1.01  | 19.1       | 3.01   | >100    | >50     | >50    | 21.9         | 4.49  | 2.96  | 0.756      | 7.1         | >50        | >50    | >100    | >50     | >100   | 39.9         | 31.7  | 4.32  | 44.3       |             |
| 2586-vFP7.07  | 26.3       | 34.6   | >50     | >50     | >50    | 43.6         | 9.2   | 9.18  | 4.63       | >50         | >50        | >50    | >50     | >50     | >50    | 40.4         | >50   | 30.3  | >50        |             |
| 2602-vFP8.02  | 7.35       | 1.01   | 1.96    | 5.86    | 10.9   | 2.2          | 0.715 | 0.48  | 0.513      | 3.39        | >50        | >50    | >50     | 43.2    | >50    | 22.3         | 2.92  | 3.36  | 2.26       | 12.1        |
| 2602-vFP8.03  | >50        | 21.3   | 17.9    | >50     | 18.1   | >50          | 12.5  | 26.6  | 18.4       | >50         | >50        | >50    | >50     | >50     | >50    | >50          | >50   | >50   | >50        | >50         |
| 2682-vFP9.01  | 6.29       | 6.63   | >50     | >50     | >50    | 26.9         | 16    | 1.32  | 1.69       | 18.3        | >50        | >50    | >50     | >50     | >50    | >50          | 10.37 | 8.49  | >50        | >50         |
| 2703-vFP12.01 | >50        | 13.9   | 5.01    | >50     | >50    | >50          | 25.9  | >50   | >50        | >50         | >50        | >50    | >50     | >50     | >50    | >50          | >50   | >50   | >50        | >50         |
| 2703-vFP12.02 | >50        | 11.3   | 36.1    | >50     | >50    | >50          | 8.04  | 7.53  | 8.13       | 38.5        | >50        | >50    | >50     | >50     | >50    | >50          | 30.3  | 49.3  | 40.7       | >50         |
| 2703-vFP12.04 | 11.4       | 4.31   | 3.58    | 8.16    | 35.6   | 6.96         | 0.831 | 3.9   | 0.796      | 8.47        | >50        | >50    | >50     | 41.3    | >50    | 3.47         | 23.8  | 4.06  | 36.1       | >50         |
| 2703-vFP12.06 | 36.1       | 28.2   | 5.67    | 32.6    | >50    | 15.3         | 8.6   | 5.96  | 6.45       | >50         | >50        | >50    | >50     | >50     | >50    | 39.1         | 30.5  | 39.2  | 23.1       | >50         |
| 2711-vFP15.01 | 45.5       | 24.5   | >50     | >50     | 40.3   | 44.9         | 6.07  | 8.61  | 2.97       | >50         | >50        | >50    | >50     | >50     | >50    | 31.1         | >50   | 24.8  | >50        | >50         |
| 2711-vFP15.02 | 4.15       | 1.55   | 6.68    | 32.3    | 20     | 9.24         | 2.85  | 2.38  | 1.51       | 13.2        | >50        | >50    | >50     | >50     | >50    | 10.4         | 24.3  | 5.05  | >50        | >50         |
| 2711-vFP15.03 | 3.97       | 14.4   | >50     | >50     | 10.9   | 21.2         | 27.6  | 0.922 | 0.562      | 23.8        | >50        | >50    | >50     | >50     | >50    | >50          | >50   | 7.42  | 2.05       | >50         |
| 2711-vFP15.04 | 19.8       | 5.16   | >50     | >50     | >50    | 36.1         | 3.79  | 4.66  | 1.73       | 23.3        | >50        | >50    | >50     | >50     | >50    | >50          | 16.3  | >50   | 9.56       | >50         |
| 2711-vFP15.05 | 23         | 6.39   | 4.75    | >50     | 13.7   | 17.9         | 7.38  | 3.34  | 2.09       | 23.5        | >50        | >50    | >50     | >50     | >50    | >50          | 15.8  | 42.4  | 8.88       | >50         |
| 2711-vFP15.07 | 2.01       | 5.91   | 46.2    | >50     | 18.2   | >50          | 6.52  | 3.82  | 0.751      | 6.84        | >50        | >50    | >50     | >50     | >50    | >50          | 25.4  | >50   | 3.03       | 44.3        |
| 2712-vFP16.02 | 1.44       | 0.84   | 6.72    | 3.26    | 2.67   | 2.64         | 1.06  | 0.203 | 0.355      | 1.29        | 15         | 13.4   | >50     | 14.3    | 35     | 9.31         | 3.6   | 0.688 | 1.21       | 3.83        |
| 2713-vFP17.01 | >50        | >50    | 7.2     | 12.3    | >50    | 18.9         | 19.3  | 4.05  | 1.46       | 23.7        | >50        | >50    | >50     | >50     | >50    | >50          | >50   | >50   | 13         | >50         |
| 2716-vFP20.01 | 2.84       | 1.67   | 1.16    | 3.91    | 6.56   | 2.47         | 1.82  | 0.644 | 0.608      | 4.39        | >50        | 40.7   | >50     | 23.2    | >50    | 8.15         | 6.96  | 3.63  | 3.39       | 20.3        |
| 2787-vFP26.02 | >50        | 15.1   | 8.51    | >50     | >50    | 29.5         | 17.1  | 23.1  | 3.95       | 19.5        | >50        | >50    | >50     | >50     | >50    | >50          | >50   | >50   | 22.6       | >50         |
| 2787-vFP26.03 | 3.96       | 27.7   | >50     | 22.7    | >50    | 39.2         | 8.43  | 0.539 | 0.574      | 9.46        | >50        | >50    | >50     | >50     | >50    | >50          | 29.6  | 3.54  | 2.37       | >50         |
| 2787-vFP26.04 | 4.25       | 2.91   | 8.42    | 19.8    | 28.8   | 6.04         | 10.6  | 1.3   | 1.23       | 15.2        | >50        | >50    | >50     | >50     | >50    | 26.7         | >50   | 8.24  | 4.49       | >50         |
| 2788-vFP27.01 | 1.84       | 6.9    | 9.55    | >50     | 24.8   | 16.4         | 11    | 1.45  | 1.03       | 28.2        | >50        | >50    | >50     | >50     | >50    | >50          | 46.3  | 11.1  | 5.41       | >50         |
| 2790-vFP30.01 | 5.48       | 3.18   | 9.71    | 7.39    | 40.2   | 1.73         | 4.17  | 2.12  | 2.03       | 7.28        | >50        | >50    | >50     | 42.3    | >50    | 5.6          | 12.1  | 14.1  | 8.11       | 30.3        |
| 2791-vFP31.01 | 7.05       | 1.92   | 14.8    | 17.3    | 36.9   | 21.5         | 3.92  | 1.27  | 1.14       | 9.7         | >50        | >50    | >50     | >50     | >50    | >50          | 21.6  | 7.47  | 3.5        | >50         |
| 2792-vFP32.01 | 35.9       | 30.4   | >50     | 35.3    | >50    | 9.38         | 19.7  | 2.86  | 3.13       | 11.2        | >50        | >50    | >50     | >50     | >50    | 32           | 40.6  | 17.4  | 12.7       | 40.8        |
| 2792-vFP32.03 | >50        | 33.1   | >50     | 2.33    | >50    | 0.751        | 1.11  | 7.93  | 1.27       | 2.53        | >50        | >50    | >50     | 17.9    | >50    | 2.03         | 2.62  | >50   | 8.05       | 11.6        |
| 2792-vFP32.04 | 34.3       | 4.75   | >50     | 8.55    | >50    | 17.2         | 4.46  | 2.38  | 1.03       | 26.7        | >50        | >50    | >50     | 47.9    | >50    | >50          | 23    | 22.3  | 3.73       | >50         |
| 2792-vFP32.06 | 20.2       | 44.8   | >50     | >50     | >50    | 24.6         | 10.9  | 2.4   | 2.42       | 44.2        | >50        | >50    | >50     | >50     | >50    | >50          | 49.8  | 24.9  | 19.2       | >50         |
| 2792-vFP32.07 | >50        | 8.49   | >50     | 2.86    | >50    | 1.67         | 1.17  | 10.7  | 1.14       | 2.93        | >50        | >50    | >50     | 23.3    | >50    | 6.09         | 3.66  | >50   | 7          | 15.4        |
| N123-VRC34.01 | 0.028      | 0.083  | 0.028   | 0.048   | 4.11   | 0.069        | >50   | 0.033 | 0.128      | 0.721       | 0.138      | 0.36   | 0.111   | 0.193   | >50    | 0.331        | >50   | 1.54  | 6.22       | 24.2        |

### Supplementary Table 3. vFP antibody and sera neutralization.

c. NHP sera neutralization against a panel of 58 isolates with matching FP sequence in the first 8 residues to the immunogens and naturally missing glycans highlighted in gray.

| Virus ID                                 | Clade | Naturally missing glycan in FP region |     |     |     | Env trimer only (Wk18) |      | NHP DF3R |      | NHP DFPE |      | FP-KLH + Env trimer (Wk46) |      |          |      |         |      |      |      |    |  |
|------------------------------------------|-------|---------------------------------------|-----|-----|-----|------------------------|------|----------|------|----------|------|----------------------------|------|----------|------|---------|------|------|------|----|--|
|                                          |       | 88                                    | 241 | 448 | 611 | ID50                   | ID80 | ID50     | ID80 | ID50     | ID80 | NHP DF1W                   |      | NHP DF4B |      | NHP 0PV |      |      |      |    |  |
|                                          |       |                                       |     |     |     |                        |      |          |      |          |      | ID50                       | ID80 | ID50     | ID80 | ID50    | ID80 | ID50 | ID80 |    |  |
| 9439.v5.c1                               | A     |                                       |     |     |     | <20                    | <20  | <20      | <20  | <20      | <20  | <20                        | <20  | <20      | <20  | <20     | <20  | <20  | <20  |    |  |
| 3365.v2.c20                              | A     |                                       |     |     |     | <20                    | <20  | <20      | <20  | <20      | <20  | 34                         | <20  | <20      | <20  | <20     | <20  | <20  | <20  |    |  |
| 398-F1_F6_20                             | A     |                                       |     |     |     | <20                    | <20  | <20      | <20  | <20      | <20  | 111                        | <20  | <20      | <20  | <20     | 32   | <20  | <20  |    |  |
| BB201.B42                                | A     |                                       |     |     |     | <20                    | <20  | <20      | <20  | <20      | <20  | 55                         | <20  | <20      | <20  | <20     | 24   | <20  | <20  |    |  |
| BB539.2B13                               | A     |                                       |     |     |     | <20                    | <20  | <20      | <20  | <20      | <20  | 62                         | <20  | <20      | <20  | <20     | <20  | <20  | <20  |    |  |
| BG505.W6M.C2                             | A     | ■                                     |     |     |     | 526                    | 149  | 129      | <20  | 133      | <20  | 240                        | 31   | 33       | <20  | 48      | <20  | <20  | <20  |    |  |
| B1369.9A                                 | A     |                                       |     |     |     | <20                    | <20  | <20      | <20  | <20      | <20  | 73                         | <20  | <20      | <20  | <20     | <20  | <20  | <20  |    |  |
| KER2008.12                               | A     |                                       |     |     |     | <20                    | <20  | <20      | <20  | <20      | <20  | 76                         | <20  | <20      | <20  | <20     | <20  | <20  | <20  |    |  |
| KNH1209.18                               | A     |                                       |     |     |     | <20                    | <20  | <20      | <20  | <20      | <20  | 40                         | <20  | <20      | <20  | <20     | <20  | <20  | <20  |    |  |
| MB201.A1                                 | A     |                                       |     |     |     | <20                    | <20  | <20      | <20  | <20      | <20  | <20                        | <20  | <20      | <20  | <20     | <20  | <20  | <20  |    |  |
| MB539.2B7                                | A     |                                       |     |     |     | <20                    | <20  | <20      | <20  | <20      | <20  | 24                         | <20  | <20      | <20  | <20     | <20  | <20  | <20  |    |  |
| M1369.A5                                 | A     |                                       |     |     |     | <20                    | <20  | <20      | <20  | <20      | <20  | 144                        | <20  | <20      | <20  | <20     | 23   | <20  | <20  |    |  |
| Q23.17                                   | A     |                                       |     |     |     | <20                    | <20  | <20      | <20  | 35       | <20  | 214                        | 39   | <20      | <20  | 40      | <20  | <20  | <20  |    |  |
| Q259.17                                  | A     |                                       |     |     |     | <20                    | <20  | <20      | <20  | <20      | <20  | <20                        | <20  | <20      | <20  | <20     | <20  | <20  | <20  |    |  |
| Q842.d12                                 | A     |                                       |     |     |     | <20                    | <20  | <20      | <20  | <20      | <20  | <20                        | <20  | <20      | <20  | <20     | <20  | <20  | <20  |    |  |
| QH209.14M.A2                             | A     |                                       |     |     |     | <20                    | <20  | <20      | <20  | <20      | <20  | 182                        | 29   | <20      | <20  | <20     | <20  | <20  | <20  |    |  |
| RW020.2                                  | A     |                                       |     |     |     | <20                    | <20  | <20      | <20  | 27       | <20  | 100                        | 27   | <20      | <20  | 24      | <20  | <20  | <20  |    |  |
| 246-F3.C10.2                             | AC    |                                       |     |     |     | <20                    | <20  | <20      | <20  | <20      | <20  | <20                        | <20  | <20      | <20  | <20     | <20  | <20  | <20  |    |  |
| 3301.V1.C24                              | AC    |                                       |     | ■   |     | <20                    | <20  | <20      | <20  | <20      | <20  | <20                        | <20  | <20      | <20  | <20     | <20  | <20  | <20  |    |  |
| 3589.V1.C4                               | AC    |                                       |     | ■   |     | <20                    | <20  | <20      | <20  | <20      | <20  | 21                         | <20  | <20      | <20  | <20     | <20  | <20  | <20  |    |  |
| 9815.V3.C3                               | ACD   |                                       |     |     |     | <20                    | <20  | <20      | <20  | 30       | <20  | 228                        | 29   | <20      | <20  | 26      | <20  | <20  | <20  |    |  |
| Q168.a2                                  | AD    |                                       |     |     |     | <20                    | <20  | <20      | <20  | <20      | <20  | 32                         | <20  | <20      | <20  | <20     | <20  | <20  | <20  |    |  |
| 3988.25                                  | B     |                                       |     |     |     | <20                    | <20  | <20      | <20  | <20      | <20  | 45                         | <20  | <20      | <20  | <20     | <20  | <20  | <20  |    |  |
| 45_01dG5                                 | B     |                                       |     |     |     | <20                    | <20  | <20      | <20  | <20      | <20  | 64                         | <20  | <20      | <20  | <20     | <20  | <20  | <20  |    |  |
| 89.6.DG                                  | B     |                                       |     |     |     | <20                    | <20  | <20      | <20  | 20       | <20  | 23                         | <20  | <20      | <20  | <20     | <20  | <20  | <20  |    |  |
| Bal.01                                   | B     |                                       |     |     |     | <20                    | <20  | <20      | <20  | <20      | <20  | 78                         | <20  | <20      | <20  | <20     | <20  | <20  | <20  |    |  |
| BL01.DG                                  | B     |                                       |     |     |     | <20                    | <20  | <20      | <20  | <20      | <20  | 123                        | 34   | <20      | <20  | <20     | <20  | <20  | <20  |    |  |
| CNE57                                    | B     |                                       |     |     |     | <20                    | <20  | <20      | <20  | 34       | <20  | 20                         | <20  | <20      | <20  | 37      | <20  | <20  | <20  |    |  |
| HO86.8                                   | B     |                                       |     |     |     | <20                    | <20  | <20      | <20  | 26       | <20  | 52                         | <20  | <20      | <20  | <20     | <20  | <20  | <20  |    |  |
| JRFLJB                                   | B     |                                       |     |     |     | <20                    | <20  | <20      | <20  | <20      | <20  | 61                         | <20  | <20      | <20  | <20     | <20  | <20  | <20  |    |  |
| BJOX002000.0                             | BC    |                                       |     | ■   |     | <20                    | <20  | <20      | <20  | <20      | <20  | <20                        | <20  | <20      | <20  | <20     | <20  | <20  | <20  |    |  |
| B.2                                      | BC    |                                       |     | ■   |     | <20                    | <20  | <20      | <20  | <20      | <20  | <20                        | <20  | <20      | <20  | <20     | <20  | <20  | <20  |    |  |
| CH117.4                                  | BC    |                                       |     |     |     | <20                    | <20  | <20      | <20  | <20      | <20  | 26                         | <20  | <20      | <20  | <20     | <20  | <20  | <20  |    |  |
| CH119.10                                 | BC    |                                       |     |     |     | <20                    | <20  | <20      | <20  | 26       | <20  | 36                         | <20  | <20      | <20  | <20     | <20  | <20  | <20  |    |  |
| CNE15                                    | BC    |                                       |     |     |     | <20                    | <20  | <20      | <20  | <20      | <20  | 45                         | <20  | <20      | <20  | <20     | <20  | <20  | <20  |    |  |
| CNE19                                    | BC    |                                       |     | ■   |     | 54                     | <20  | <20      | <20  | 93       | 28   | 198                        | 20   | 28       | <20  | 64      | <20  | <20  | <20  |    |  |
| CNE21                                    | BC    |                                       |     |     |     | <20                    | <20  | <20      | <20  | <20      | <20  | <20                        | <20  | <20      | <20  | <20     | <20  | <20  | <20  |    |  |
| CNE40                                    | BC    |                                       |     |     |     | 33                     | <20  | 22       | <20  | <20      | <20  | <20                        | <20  | <20      | <20  | <20     | <20  | <20  | <20  |    |  |
| 286.36                                   | C     |                                       |     |     |     | <20                    | <20  | <20      | <20  | <20      | <20  | 154                        | 27   | <20      | <20  | <20     | <20  | <20  | <20  |    |  |
| 9921.V2.C14                              | C     |                                       |     |     |     | <20                    | <20  | <20      | <20  | <20      | <20  | 27                         | <20  | <20      | <20  | <20     | <20  | <20  | <20  |    |  |
| 25710.2.43                               | C     | ■                                     |     |     |     | 23                     | <20  | <20      | <20  | 100      | 24   | 859                        | 244  | 22       | <20  | 123     | 40   | <20  | <20  |    |  |
| 3873.V1.C24                              | C     |                                       |     | ■   |     | <20                    | <20  | <20      | <20  | <20      | <20  | 147                        | 36   | <20      | <20  | <20     | <20  | <20  | <20  |    |  |
| 426c                                     | C     |                                       |     |     |     | <20                    | <20  | <20      | <20  | <20      | <20  | <20                        | <20  | <20      | <20  | <20     | <20  | <20  | <20  |    |  |
| 96ZM651.02                               | C     |                                       |     | ■   |     | <20                    | <20  | <20      | <20  | 44       | <20  | 169                        | <20  | <20      | <20  | 32      | <20  | <20  | <20  |    |  |
| BR025.9                                  | C     |                                       |     |     |     | <20                    | <20  | <20      | <20  | <20      | <20  | <20                        | <20  | <20      | <20  | <20     | <20  | <20  | <20  |    |  |
| CAP210.E8                                | C     |                                       |     |     |     | <20                    | <20  | <20      | <20  | 23       | <20  | 21                         | <20  | <20      | <20  | <20     | <20  | <20  | <20  |    |  |
| Ce1176.A3                                | C     |                                       |     | ■   |     | <20                    | <20  | <20      | <20  | <20      | <20  | 97                         | <20  | <20      | <20  | <20     | <20  | <20  | <20  |    |  |
| CNE31                                    | C     |                                       |     |     |     | <20                    | <20  | <20      | <20  | <20      | <20  | <20                        | <20  | <20      | <20  | <20     | <20  | <20  | <20  |    |  |
| CNE58                                    | C     |                                       |     |     |     | <20                    | <20  | <20      | <20  | <20      | <20  | 121                        | <20  | <20      | <20  | <20     | <20  | <20  | <20  |    |  |
| DU172.17                                 | C     |                                       |     |     |     | <20                    | <20  | <20      | <20  | <20      | <20  | 42                         | <20  | <20      | <20  | <20     | <20  | <20  | <20  |    |  |
| MW965.26                                 | C     |                                       |     | ■   |     | 92                     | 40   | 151      | 54   | 77       | 34   | 130                        | 40   | 32       | <20  | 83      | 40   | <20  | <20  |    |  |
| TV1.29                                   | C     |                                       |     | ■   |     | <20                    | <20  | <20      | <20  | <20      | <20  | 28                         | <20  | <20      | <20  | <20     | <20  | <20  | <20  |    |  |
| ZA012.29                                 | C     |                                       |     |     |     | <20                    | <20  | <20      | <20  | <20      | <20  | <20                        | <20  | <20      | <20  | <20     | <20  | <20  | <20  |    |  |
| ZM109.4                                  | C     |                                       |     |     |     | <20                    | <20  | <20      | <20  | <20      | <20  | <20                        | <20  | <20      | <20  | <20     | <20  | <20  | <20  |    |  |
| ZM135.10a                                | C     |                                       |     | ■   |     | <20                    | <20  | <20      | <20  | <20      | <20  | <20                        | <20  | <20      | <20  | <20     | <20  | <20  | <20  |    |  |
| ZM176.66                                 | C     |                                       |     | ■   |     | <20                    | <20  | <20      | <20  | <20      | <20  | 145                        | 32   | <20      | <20  | <20     | <20  | <20  | <20  |    |  |
| ZM214.15                                 | C     |                                       |     |     |     | <20                    | <20  | <20      | <20  | <20      | <20  | <20                        | <20  | <20      | <20  | <20     | <20  | <20  | <20  |    |  |
| ZM233.6                                  | C     |                                       |     |     |     | <20                    | <20  | <20      | <20  | <20      | <20  | 71                         | <20  | <20      | <20  | <20     | <20  | <20  | <20  |    |  |
| ZM55.28a                                 | C     |                                       |     | ■   |     | <20                    | <20  | <20      | <20  | <20      | <20  | 102                        | 21   | <20      | <20  | <20     | <20  | <20  | <20  |    |  |
| SVA.MLV                                  | NA    |                                       |     |     |     | <20                    | <20  | <20      | <20  | <20      | <20  | <20                        | <20  | <20      | <20  | <20     | <20  | <20  | <20  |    |  |
| Total number of tested                   |       |                                       |     |     |     | 58                     | 58   | 58       | 58   | 58       | 58   | 58                         | 58   | 58       | 58   | 58      | 58   | 58   | 58   | 58 |  |
| Number of neutralized (ID50/80>criteria) |       |                                       |     |     |     | 5                      | 2    | 3        | 1    | 12       | 3    | 41                         | 13   | 4        | 0    | 12      | 2    |      |      |    |  |
| % neutralized of tested                  |       |                                       |     |     |     | 9%                     | 3%   | 5%       | 2%   | 21%      | 5%   | 71%                        | 22%  | 7%       | 0%   | 21%     | 3%   |      |      |    |  |
| at least % neutralized of total 208      |       |                                       |     |     |     | 2%                     | 1%   | 1%       | 0%   | 6%       | 1%   | 20%                        | 6%   | 2%       | 0%   | 6%      | 1%   |      |      |    |  |
| Geometric mean ID50/80 of neutralized    |       |                                       |     |     |     | 72                     | 77   | 75       | 54   | 42       | 28   | 75                         | 35   | 28       | 20   | 40      | 40   |      |      |    |  |

100-1000  
20-100  
<20

## Supplementary Table 4. Data collection and refinement statistics.

### a. Crystal data collection and refinement statistics (molecular replacement)

| PDB accession code                                   | vFP1.01:FP<br>5TKJ                             | vFP5.01:FP<br>5TKK            | vFP7.04:FP<br>6CDM           | vFP16.02:FP<br>6CDO               | vFP20.01:FP<br>6CDP           |
|------------------------------------------------------|------------------------------------------------|-------------------------------|------------------------------|-----------------------------------|-------------------------------|
| <b>Data collection</b>                               |                                                |                               |                              |                                   |                               |
| Space group                                          | P 2 <sub>1</sub> 2 <sub>1</sub> 2 <sub>1</sub> | P 2 <sub>1</sub>              | P 2 <sub>1</sub>             | P 4 <sub>1</sub> 2 <sub>1</sub> 2 | C 2 2 2 <sub>1</sub>          |
| Cell dimensions                                      |                                                |                               |                              |                                   |                               |
| <i>a</i> , <i>b</i> , <i>c</i> (Å)                   | 76.16, 120.18, 226.18                          | 36.24, 82.23, 72.26           | 79.57, 61.03, 88.65          | 141.03, 141.03, 77.64             | 60.46, 192.31, 87.56          |
| $\alpha$ , $\beta$ , $\gamma$ (°)                    | 90.00, 90.00, 90.00                            | 90.00, 90.23, 90.00           | 90.00, 91.89, 90.00          | 90.00, 90.00, 90.00               | 90.00, 90.00, 90.00           |
| Resolution (Å)                                       | 50 - 2.12 (2.16 - 2.12)*                       | 50 - 1.55 (1.58 - 1.55)       | 50 - 2.41 (2.49 - 2.41)      | 50 - 2.10 (2.17 - 2.10)           | 50 - 2.46 (2.54 - 2.46)       |
| <i>R</i> <sub>sym</sub> or <i>R</i> <sub>merge</sub> | 0.093 (0.517)                                  | 0.066 (0.468)                 | 0.127 (0.412)                | 0.108 (0.931)                     | 0.118 (0.423)                 |
| <i>I</i> / $\sigma$ <i>I</i>                         | 20.7 (2.4)                                     | 16.1 (2.1)                    | 10.0 (2.0)                   | 30.9 (2.2)                        | 19.8 (2.1)                    |
| Completeness (%)                                     | 99.6 (97.8)                                    | 97.2 (85.2)                   | 99.3 (94.1)                  | 99.8 (98.3)                       | 97.4 (83.2)                   |
| Redundancy                                           | 7.1 (5.4)                                      | 3.5 (2.1)                     | 3.5 (2.8)                    | 13.9 (9.7)                        | 6.4 (4.9)                     |
| <b>Refinement</b>                                    |                                                |                               |                              |                                   |                               |
| Resolution (Å)                                       | 43.54 - 2.12<br>(2.16 - 2.12)                  | 25.47 - 1.55<br>(1.58 - 1.55) | 44.3 - 2.41<br>(2.49 - 2.41) | 41.95 - 2.10<br>(2.17 - 2.10)     | 48.17 - 2.46<br>(2.54 - 2.46) |
| No. reflections                                      | 843,512                                        | 209,617                       | 113,946                      | 641,724                           | 118,218                       |
| <i>R</i> <sub>work</sub> / <i>R</i> <sub>free</sub>  | 0.20 (0.24) / 0.24 (0.29)                      | 0.21 (0.31) / 0.25 (0.39)     | 0.18 (0.22) / 0.22 (0.28)    | 0.19 (0.26) / 0.23 (0.31)         | 0.21 (0.32) / 0.26 (0.39)     |
| No. atoms                                            | 14,526                                         | 3,693                         | 7,075                        | 3,805                             | 3,478                         |
| Protein                                              | 13,412                                         | 3,356                         | 6,724                        | 3,460                             | 3,406                         |
| Ligand/ion (SO <sub>4</sub> )                        | 35                                             |                               |                              | 50                                | 10                            |
| Water                                                | 1,079                                          | 337                           | 351                          | 295                               | 62                            |
| <i>B</i> -factors (Å <sup>2</sup> )                  |                                                |                               |                              |                                   |                               |
| Protein                                              | 47                                             | 38                            | 28                           | 45                                | 55                            |
| Ligand/ion                                           | 47                                             | 37                            | 27                           | 44                                | 55                            |
| Water                                                | 56                                             |                               |                              | 75                                | 66                            |
| R.m.s. deviations                                    |                                                |                               |                              |                                   |                               |
| Bond lengths (Å)                                     | 0.008                                          | 0.01                          | 0.005                        | 0.008                             | 0.003                         |
| Bond angles (°)                                      | 1.01                                           | 1.28                          | 0.91                         | 0.98                              | 0.63                          |

One crystal was used for each structure

\*Values in parentheses are for highest-resolution shell.

### b. Cryo-EM data collection and refinement statistics

|                                                     | vFP16.02-DS-SOSIP-VRC03-PGT122<br>EMD-7460<br>6CDI | vFP20.01-DS-SOSIP-VRC03-PGT122<br>EMD-7459<br>6CDE | vFP1.01-DS-SOSIP<br>EMD-8420 | vFP5.01-DS-SOSIP<br>EMD-8421, EMD-8422 |
|-----------------------------------------------------|----------------------------------------------------|----------------------------------------------------|------------------------------|----------------------------------------|
| <b>Data collection and processing</b>               |                                                    |                                                    |                              |                                        |
| Magnification                                       | 22500                                              | 130000                                             | 22500                        | 22500                                  |
| Voltage (kV)                                        | 300                                                | 300                                                | 300                          | 300                                    |
| Electron exposure (e <sup>-</sup> /Å <sup>2</sup> ) | 67.18                                              | 70.70                                              | 67.39                        | 68.58                                  |
| Defocus range (µm)                                  | ~-1.0 - -4.0                                       | ~-2.0 - -3.0                                       | ~-1.8 - -4.0                 | ~-1.0 - -3.5                           |
| Pixel size (Å)                                      | 1.07                                               | 1.06                                               | 1.07                         | 1.07                                   |
| Symmetry imposed                                    | C3                                                 | C3                                                 | C3                           | C1                                     |
| Initial particle images (no.)                       | 206112                                             | 108962                                             | 53263                        | 45231                                  |
| Final particle images (no.)                         | 57278                                              | 48248                                              | 14931                        | 7383, 41278                            |
| Map resolution (Å)                                  | 3.6                                                | 3.8                                                | 8.6                          | 14.7, 19.6                             |
| FSC threshold                                       | 0.143                                              | 0.143                                              | 0.143                        | 0.143                                  |
| Map resolution range (Å)                            | 3.4-8.9                                            | 3.4-8.7                                            |                              |                                        |
| <b>Refinement</b>                                   |                                                    |                                                    |                              |                                        |
| Initial model used (PDB code)                       | 5FYL, 3SE8, 6CDO                                   | 5FYL, 3SE8, 6CDP                                   |                              |                                        |
| Model resolution (Å)                                | 3.7                                                | 3.9                                                |                              |                                        |
| FSC threshold                                       | 0.5                                                | 0.5                                                |                              |                                        |
| Model resolution range (Å)                          | 10-3.6                                             | 10-3.4                                             |                              |                                        |
| Map sharpening <i>B</i> factor (Å <sup>2</sup> )    | -68.00                                             | -69.47                                             |                              |                                        |
| Model composition                                   |                                                    |                                                    |                              |                                        |
| Non-hydrogen atoms                                  | 33165                                              | 33057                                              |                              |                                        |
| Protein residues                                    | 3849                                               | 3852                                               |                              |                                        |
| <i>B</i> factors (Å <sup>2</sup> )                  |                                                    |                                                    |                              |                                        |
| Protein                                             | 103.84                                             | 97.66                                              |                              |                                        |
| R.m.s. deviations                                   |                                                    |                                                    |                              |                                        |
| Bond lengths (Å)                                    | 0.008                                              | 0.007                                              |                              |                                        |
| Bond angles (°)                                     | 1.02                                               | 0.960                                              |                              |                                        |
| Validation                                          |                                                    |                                                    |                              |                                        |
| MolProbity score                                    | 1.69                                               | 1.65                                               |                              |                                        |
| Clashscore                                          | 7.62                                               | 5.15                                               |                              |                                        |
| Poor rotamers (%)                                   | 0.18                                               | 0                                                  |                              |                                        |
| Ramachandran plot                                   |                                                    |                                                    |                              |                                        |
| Favored (%)                                         | 93.84                                              | 94.47                                              |                              |                                        |
| Allowed (%)                                         | 6.16                                               | 5.53                                               |                              |                                        |
| Disallowed (%)                                      | 0                                                  | 0                                                  |                              |                                        |

**Supplementary Table 5. Impact of alanine and glycine mutations at different FP residue positions on binding of FP-directed antibodies.**

**a**

|     | vFP1.01 | vFP1.02 | vFP2.01 | vFP3.01 | vFP4.01 | vFP5.01 | vFP6.01 | vFP7.01 | vFP7.02 | vFP7.03 | vFP7.04 | vFP7.05 | vFP16.02 | vFP20.01 | VRC34.01 |
|-----|---------|---------|---------|---------|---------|---------|---------|---------|---------|---------|---------|---------|----------|----------|----------|
| 512 | 1.00    | 1.00    | 1.00    | 1.00    | 1.00    | 1.00    | 1.00    | 1.00    | 1.00    | 1.00    | 1.00    | 1.00    | 1.00     | 1.00     | 1.00     |
| 513 | 0.93    | 0.97    | 0.69    | 0.70    | 0.44    | 0.59    | 0.83    | 0.90    | 0.97    | 1.02    | 1.04    | 1.02    | 1.01     | 0.99     | 0.05     |
| 514 | 0.24    | 0.21    | 0.06    | 0.04    | 0.01    | 0.41    | 0.72    | 0.08    | 0.10    | 0.04    | 0.09    | 0.09    | 0.66     | 0.48     | 0.72     |
| 515 | 0.44    | 0.44    | 0.10    | 0.04    | 0.05    | 0.07    | 0.47    | 0.25    | 0.32    | 0.27    | 0.29    | 0.23    | 0.69     | 0.66     | 0.03     |
| 516 | 1.03    | 1.07    | 1.01    | 1.05    | 0.75    | 0.56    | 0.78    | 0.99    | 0.99    | 0.99    | 1.02    | 1.00    | 0.98     | 0.99     | 0.01     |
| 517 | 1.00    | 1.00    | 1.00    | 1.00    | 1.00    | 1.00    | 1.00    | 1.00    | 1.00    | 1.00    | 1.00    | 1.00    | 1.00     | 1.00     | 1.00     |
| 518 | 0.96    | 1.06    | 1.03    | 1.00    | 1.02    | 0.92    | 0.39    | 1.01    | 1.03    | 1.06    | 1.02    | 1.06    | 1.03     | 1.02     | 0.73     |
| 519 | 0.93    | 1.03    | 0.98    | 1.02    | 1.03    | 0.14    | 0.30    | 0.98    | 1.02    | 1.04    | 1.02    | 1.03    | 1.03     | 1.01     | 0.80     |
| 520 | 0.99    | 1.06    | 1.01    | 1.07    | 1.05    | 1.01    | 1.01    | 1.03    | 1.03    | 1.05    | 1.01    | 1.04    | 1.05     | 1.05     | 1.02     |
| 521 | 0.98    | 1.08    | 1.02    | 1.09    | 1.01    | 0.99    | 1.02    | 1.03    | 1.02    | 1.02    | 1.02    | 1.00    | 1.00     | 1.00     | 0.85     |

< 0.25   0.25 - 0.50   0.50 - 0.75   > 0.75

Binding of indicated antibodies to alanine mutants normalized to binding to the wild-type FP sequence. Experiments were performed in triplicate (n=3 independent experiments).

**b**

|     | vFP1.01 | vFP1.02 | vFP2.01 | vFP3.01 | vFP4.01 | vFP5.01 | vFP6.01 | vFP7.01 | vFP7.02 | vFP7.03 | vFP7.04 | vFP7.05 | vFP16.02 | vFP20.01 | VRC34.01 |
|-----|---------|---------|---------|---------|---------|---------|---------|---------|---------|---------|---------|---------|----------|----------|----------|
| 512 | 0.98    | 1.03    | 0.85    | 1.09    | 0.85    | 0.91    | 0.60    | 0.81    | 0.94    | 0.88    | 0.98    | 0.96    | 1.00     | 0.97     | 0.52     |
| 513 | 0.12    | 0.09    | 0.06    | 0.03    | 0.04    | 0.43    | 0.59    | 0.13    | 0.14    | 0.17    | 0.30    | 0.27    | 0.51     | 0.34     | 0.00     |
| 514 | 1.00    | 1.00    | 1.00    | 1.00    | 1.00    | 1.00    | 1.00    | 1.00    | 1.00    | 1.00    | 1.00    | 1.00    | 1.00     | 1.00     | 1.00     |
| 515 | 0.05    | 0.03    | 0.02    | 0.02    | 0.01    | 0.01    | 0.12    | 0.04    | 0.01    | 0.01    | 0.01    | 0.01    | 0.03     | 0.03     | 0.00     |
| 516 | 1.00    | 1.00    | 1.00    | 1.00    | 1.00    | 1.00    | 1.00    | 1.00    | 1.00    | 1.00    | 1.00    | 1.00    | 1.00     | 1.00     | 1.00     |
| 517 | 0.83    | 0.96    | 0.93    | 0.93    | 0.96    | 0.86    | 0.93    | 0.94    | 0.92    | 0.94    | 0.97    | 0.94    | 0.97     | 0.98     | 0.75     |
| 518 | 0.98    | 1.02    | 0.96    | 0.86    | 1.01    | 0.71    | 0.10    | 0.95    | 0.98    | 1.00    | 0.98    | 0.99    | 1.02     | 1.00     | 0.49     |
| 519 | 0.95    | 0.97    | 0.84    | 0.95    | 0.88    | 0.09    | 0.39    | 0.87    | 0.92    | 0.90    | 0.89    | 0.90    | 0.92     | 0.91     | 0.49     |
| 520 | 0.99    | 1.06    | 0.97    | 1.09    | 1.03    | 1.07    | 0.95    | 0.97    | 0.99    | 1.00    | 0.98    | 1.00    | 1.01     | 1.00     | 1.01     |
| 521 | 1.00    | 1.00    | 1.00    | 1.00    | 1.00    | 1.00    | 1.00    | 1.00    | 1.00    | 1.00    | 1.00    | 1.00    | 1.00     | 1.00     | 1.00     |

< 0.25   0.25 - 0.50   0.50 - 0.75   > 0.75

Binding of indicated antibodies to glycine mutants normalized to binding to the wild-type sequence. Experiments were performed in triplicate (n=3 independent experiments).

**Supplementary Table 6. Prevalence of FP residue 512-519 by clades.**

| Clades A/ACD/AD |       | Clade AC        |       | Clade AE        |       | Clade AG        |       | Clade B         |       | Clades C/BC     |       | Clades D/CD     |       | Clade G         |       |
|-----------------|-------|-----------------|-------|-----------------|-------|-----------------|-------|-----------------|-------|-----------------|-------|-----------------|-------|-----------------|-------|
| Residue 512-519 | Count |
| AVGIGAVF        | 19    | AVGIGAVF        | 3     | AVGIGAMI        | 18    | AVLGLGAVF       | 8     | AVGIGAVF        | 8     | AVGIGAVF        | 28    | AIGLGAMF        | 6     | AVGIMGAVL       | 2     |
| AVLGLGAVF       | 3     | AVLGLGAVF       | 2     | AVGIGTMI        | 2     | AVVGLGAVF       | 2     | AVGTIGAMF       | 8     | AVLGLGAVF       | 10    | AIGLGALF        | 4     | EVTLGALF        | 1     |
| AVTMGAVF        | 2     |                 |       | AVTIGAMI        | 1     | AVGMGALI        | 1     | AVGIGALF        | 5     | AVLGLGAVL       | 4     | AIGLGAVF        | 3     | AVLGLGAVI       | 1     |
| AVFGGAFF        | 2     |                 |       | AVGIGIMI        | 1     | AVGMGALF        | 1     | AVGIGAMF        | 3     | AVGIGAVL        | 4     | AIGMGALF        | 1     | AVLGLGAVL       | 1     |
| AVVELGAVF       | 1     |                 |       | AVGIGALL        | 1     | AVLGLGALF       | 1     | AVGTIGAMF       | 2     | AVGIGAMF        | 4     |                 |       | AIGMGAVL        | 1     |
| AVGMGAVF        | 1     |                 |       |                 |       | AVLGLGAFF       | 1     | AVLGLGAMF       | 2     | AALGAVF         | 3     |                 |       | AIGLGTVL        | 1     |
| AVGMAAVF        | 1     |                 |       |                 |       | AIGMGAVF        | 1     | TVGIGALF        | 1     | AVGMGAVF        | 2     |                 |       |                 |       |
| AVGMAALF        | 1     |                 |       |                 |       | AALGAVF         | 1     | DLGLGALF        | 1     | AVGIGAVI        | 2     |                 |       |                 |       |
| AIGMGAVF        | 1     |                 |       |                 |       |                 |       | AVTLGAVF        | 1     | AVGIGALF        | 2     |                 |       |                 |       |
| AIGLGAMF        | 1     |                 |       |                 |       |                 |       | AVTLGAMF        | 1     | TVGIGAVF        | 1     |                 |       |                 |       |
|                 |       |                 |       |                 |       |                 |       | AVGMLGAMF       | 1     | AVVGLGAVF       | 1     |                 |       |                 |       |
|                 |       |                 |       |                 |       |                 |       | AVLGLGAVF       | 1     | AVGVGAVM        | 1     |                 |       |                 |       |
|                 |       |                 |       |                 |       |                 |       | AVLGLGALF       | 1     | AVGTIGAMF       | 1     |                 |       |                 |       |
|                 |       |                 |       |                 |       |                 |       | AVGIVGAMF       | 1     | AVLGLGAVI       | 1     |                 |       |                 |       |
|                 |       |                 |       |                 |       |                 |       | AVGIGAVL        | 1     | AVLGLGAMI       | 1     |                 |       |                 |       |
|                 |       |                 |       |                 |       |                 |       | AMGIGAMF        | 1     | AVLGLGAMF       | 1     |                 |       |                 |       |
|                 |       |                 |       |                 |       |                 |       | AIGIGAVF        | 1     | AVGGIGAVF       | 1     |                 |       |                 |       |
|                 |       |                 |       |                 |       |                 |       | AALGALF         | 1     | AVGGFGAMI       | 1     |                 |       |                 |       |
|                 |       |                 |       |                 |       |                 |       | AAIGALF         | 1     | AALGALF         | 1     |                 |       |                 |       |
|                 |       |                 |       |                 |       |                 |       |                 |       | AAGIGAVI        | 1     |                 |       |                 |       |

**Supplementary Table 7. Association of FP-proximal N-glycan sequons (N88, N241, N448, and N611) and neutralization based on the 208-isolate panel.**

|     | vFP1.01       | vFP7.04       | vFP7.05       | vFP16.02 | vFP20.01 | VRC34.01      |
|-----|---------------|---------------|---------------|----------|----------|---------------|
| 88  | 1             | 1             | 1             | 1        | 1        | 0.7037        |
| 241 | <b>0.0122</b> | <b>0.0233</b> | <b>0.0122</b> | 0.9382   | 0.7846   | 0.7424        |
| 448 | 1             | 1             | 1             | 0.5804   | 0.6812   | <b>0.0327</b> |
| 611 | 0.4714        | 0.5504        | 0.4714        | 0.3986   | 0.9479   | 0.7037        |

Values displayed are P-values from the two-tailed Fisher's exact test and were corrected for multiple testing using Hochberg metric. Statistically significant adjusted P-values are highlighted in red and corresponding contingency tables shown below. n=208 HIV-1 strains.

vFP1.01 - 241

|            | Resistant | Sensitive |
|------------|-----------|-----------|
| Glycan     | 190       | 16        |
| Non-glycan | 1         | 1         |

vFP7.04 - 241

|            | Resistant | Sensitive |
|------------|-----------|-----------|
| Glycan     | 183       | 16        |
| Non-glycan | 5         | 4         |

vFP7.05 - 241

|            | Resistant | Sensitive |
|------------|-----------|-----------|
| Glycan     | 186       | 13        |
| Non-glycan | 5         | 4         |

vFP34.01 - 448

|            | Resistant | Sensitive |
|------------|-----------|-----------|
| Glycan     | 94        | 86        |
| Non-glycan | 7         | 21        |

**Supplementary Table 8. vFP antibody neutralization statistics from the 208-virus isolate panel.**

| IC <sub>50</sub> <50 µg/ml                                       | 1868-vFP1.01 | 1868-vFP5.01 | 2586-vFP7.04 | 2586-vFP7.05 | 2712-vFP16.02 | 2716-vFP20.01 | N123-VRC34.01 |
|------------------------------------------------------------------|--------------|--------------|--------------|--------------|---------------|---------------|---------------|
| Neutralization breadth on 208 virus panel                        | 8.17%        | 0.96%        | 9.62%        | 8.17%        | 31.3%         | 27.4%         | 51.4%         |
| Neutralization breadth on global virus panel                     | 8.33%        | 0%           | 8.33%        | 16.7%        | 41.7%         | 41.7%         | 75.0%         |
| Neutralization breadth against neutralization-resistant isolates | 7.69%        | 0%           | 8.33%        | 8.33%        | 28.9%         | 25.0%         | 50.0%         |
| Neutralization breadth on FP8-sequence viruses                   | 20.7%        | 1.72%        | 22.4%        | 17.2%        | 72.4%         | 74.1%         | 94.8%         |

| IC <sub>50</sub> <100 µg/ml                              | 1868-vFP1.01 | 1868-vFP5.01 | 2586-vFP7.04 | 2586-vFP7.05 | 2712-vFP16.02 | 2716-vFP20.01 | N123-VRC34.01 |
|----------------------------------------------------------|--------------|--------------|--------------|--------------|---------------|---------------|---------------|
| Neutralization breadth on 208 virus panel                | 9.62%        | 1.92%        | 11.1%        | 8.65%        | 36.5%         | 32.2%         | 51.92%        |
| Neutralization breadth on global virus panel             | 16.7%        | 0%           | 8.33%        | 16.7%        | 41.7%         | 50.0%         | 75.0%         |
| Neutralization breadth neutralization-resistant isolates | 7.69%        | 0%           | 10.3%        | 8.97%        | 34.0%         | 28.9%         | 50.6%         |
| Neutralization breadth on FP8-sequence viruses           | 25.9%        | 3.45%        | 27.6%        | 19.0%        | 81.0%         | 82.8%         | 94.8%         |

| IC <sub>50</sub> <500 µg/ml                              | 2712-vFP16.02 |
|----------------------------------------------------------|---------------|
| Neutralization breadth on 208 virus panel                | 46.6%         |
| Neutralization breadth on global virus panel             | 66.7%         |
| Neutralization breadth neutralization-resistant isolates | 46.1%         |
| Neutralization breadth on FP8-sequence viruses           | 96.6%         |

Neutralization breadth of FP targeting neutralizing antibodies evaluated based on different virus panels: a 208-isolate panel evaluated in this study; the global panel (deCamp et al. 2013 JVI); the neutralization-resistant strains in the 208-isolate panel (154 strains that were not neutralized by antibodies 17b, 48d, F105, 447-52D and 3074); the 58 strains in the 208-isolate panel that have the identical N-terminal 8-mer of the FP as BG505. Breadth statistics for IC<sub>50</sub><50 µg/ml are shown at top, statistics for IC<sub>50</sub><100 µg/ml are shown in the middle, and statistics for IC<sub>50</sub><500 µg/ml are shown at bottom.
